# Supplementary material for: Self-care practices and associated factors among type 2 diabetes mellitus patients attending public hospitals in Bale zone, Oromia region, Ethiopia
Source: PeerJ journal article supplement (doi:10.7717/peerj.19529), 2025-06-20
Supplement: Questionnaire.pdf [file Questionnaire.pdf]

**Self-Care Practices and Associated Factors Among Type 2 Diabetes Mellitus Patients Attending Public Hospitals in Bale Zone, Oromia Region, Ethiopia.**

**Questionnaire**

# Unique Number \_\_\_\_\_

Questionnaire (**English Version**)

**PART I:- Socio-Demographic Characteristics**

| S.no                                                           | Questions                       | Possible response                                                                                                                                   | Remark |
|----------------------------------------------------------------|---------------------------------|-----------------------------------------------------------------------------------------------------------------------------------------------------|--------|
| Q101                                                           | Age (in years)                  | _____years                                                                                                                                          |        |
| Q102                                                           | Sex                             | Male<br>2. Female                                                                                                                                   |        |
| Q103                                                           | Marital Status                  | Single<br>2. Married<br>3. Divorced<br>4. Widowed                                                                                                   |        |
| Q104                                                           | Educational Status              | 1. Not able to read and write<br>2. Able to read and write only<br>3. Primary education /1-8/<br>4. Secondary education /9-12/<br>5. Above grade 12 |        |
| Q105                                                           | Occupation                      | 1. Governmental employee<br>2. Private employee<br>3. Merchant<br>4. Housewife<br>5. Farmer<br>6. Daily laborer<br>7. Student<br>8. Other Specify   |        |
| Q106                                                           | Economic status(monthly income) | ----- birr                                                                                                                                          |        |
| <b>PART II –Clinical and other factors related to diabetes</b> |                                 |                                                                                                                                                     |        |

| No   | Questions                                                                                       | Possible responses                                                                                                                              | Remark |
|------|-------------------------------------------------------------------------------------------------|-------------------------------------------------------------------------------------------------------------------------------------------------|--------|
| Q201 | How long you have been diagnosed with diabetes Mellitus                                         | -----years                                                                                                                                      |        |
| Q202 | Do you have any diabetic-related long-term complications?                                       | Yes<br>No                                                                                                                                       |        |
| Q203 | If your answer is yes Q202 which type of complications do have? (multiple answers are possible) | Diabetic nephropathy<br>Diabetic neuropathy<br>Diabetic retinopathy<br>Diabetic foot ulcer<br>Diabetic-related heart disease<br>Others(specify) |        |
| Q204 | Have you ever diabetic health education about diabetes self-care                                | Yes<br>No                                                                                                                                       |        |
| Q205 | If your answer is yes to Q204 from where did you set health education                           | Doctors(others health personal)<br>Mass media<br>Friends or family<br>Others(specify)                                                           |        |
| Q206 | Are you a member of the diabetic association                                                    | Yes<br>No                                                                                                                                       |        |

**PART III – Self-care Knowledge Questionnaire**

Modifiable lifestyle (standard..Diabetes knowledge test questionnaire 18 items)

| No   | Questions                                                                                                                               | Possible responses |    | Remark |
|------|-----------------------------------------------------------------------------------------------------------------------------------------|--------------------|----|--------|
|      |                                                                                                                                         | Yes                | No |        |
| Q301 | Are you aware of the importance of maintaining a balanced diet for overall health and wellness?                                         |                    |    |        |
| Q302 | Do you understand the significance of regular physical activity in improving your lifestyle?                                            |                    |    |        |
| Q303 | Are you knowledgeable about the adverse effects of smoking and the benefits of quitting?                                                |                    |    |        |
| Q304 | Do you know the recommended guidelines for alcohol consumption and the potential risks of excessive drinking?                           |                    |    |        |
| Q305 | Are you aware of the impact of stress on your health and the importance of stress management techniques?                                |                    |    |        |
| Q306 | Do you understand the importance of adequate sleep for your overall well-being?                                                         |                    |    |        |
| Q307 | Are you knowledgeable about the benefits of maintaining a healthy body weight?                                                          |                    |    |        |
| Q308 | Do you understand the risks associated with excessive sedentary behaviour and the importance of regular movement throughout the day?    |                    |    |        |
| Q309 | Are you aware of the significance of maintaining good oral hygiene for overall health?                                                  |                    |    |        |
| Q310 | Do you understand the importance of regular health check-ups and screenings for early detection of potential health issues?             |                    |    |        |
| Q311 | Are you knowledgeable about the harmful effects of prolonged exposure to the sun and the importance of using sun protection?            |                    |    |        |
| Q312 | Do you understand the benefits of drinking an adequate amount of water and staying hydrated?                                            |                    |    |        |
| Q313 | Are you aware of the potential risks of excessive consumption of processed foods and the benefits of choosing whole, unprocessed foods? |                    |    |        |
| Q314 | Do you understand the impact of excessive caffeine intake                                                                               |                    |    |        |

|      |                                                                                                                              |  |  |  |
|------|------------------------------------------------------------------------------------------------------------------------------|--|--|--|
|      | on your health and the importance of moderation?                                                                             |  |  |  |
| Q315 | Are you knowledgeable about the benefits of maintaining social connections and engaging in positive relationships?           |  |  |  |
| Q316 | Do you know the importance of allocating time for relaxation and engaging in hobbies or activities you enjoy?                |  |  |  |
| Q317 | Are you aware of the impact of excessive screen time on your physical and mental well-being?                                 |  |  |  |
| Q318 | Do you understand the benefits of practising mindfulness and incorporating stress-reduction techniques into your daily life? |  |  |  |

### Medication Adherence (8 risky item tool )

| No                                                               | Questions                                                                                                                                                                    | Possible responses |    | Remark |
|------------------------------------------------------------------|------------------------------------------------------------------------------------------------------------------------------------------------------------------------------|--------------------|----|--------|
|                                                                  |                                                                                                                                                                              | Yes                | No |        |
| Q319                                                             | Do you sometimes forget to take your diabetes pills?                                                                                                                         |                    |    |        |
| Q320                                                             | People sometimes miss taking their medications for reasons other than forgetting. Thinking over the past two weeks, were there any days when you did not take your medicine? |                    |    |        |
| Q321                                                             | Have you ever cut back or stopped taking your medicine without telling your doctor because you felt worse when you took it?                                                  |                    |    |        |
| Q322                                                             | Are you sometimes when you travel or leave home, in a hurry and forget to take your diabetes medication?                                                                     |                    |    |        |
| Q323                                                             | . Did you take all your medicine yesterday?                                                                                                                                  |                    |    |        |
| Q324                                                             | When you feel like your symptoms are under control do you sometimes stop taking your medicine?                                                                               |                    |    |        |
| Q325                                                             | Taking medicine every day is a real inconvenience for some people, do you ever feel hassled about sticking to your treatment plan?                                           |                    |    |        |
| Q326                                                             | How often do you have difficulty remembering to take all your medicine?                                                                                                      |                    |    |        |
| <b>A consequence of uncontrolled blood sugar level (4 items)</b> |                                                                                                                                                                              |                    |    |        |
| Q327                                                             | If blood sugar is close to normal, a person with diabetes is likely to have more energy, feel less thirsty, and urinate less often                                           |                    |    |        |
| Q328                                                             | Prolonged high blood sugar levels can cause eye problems or even blindness                                                                                                   |                    |    |        |
| Q329                                                             | Prolonged uncontrolled blood sugar levels can cause heart attack, stroke, and kidney problem                                                                                 |                    |    |        |

|      |                                                                                    |  |  |  |
|------|------------------------------------------------------------------------------------|--|--|--|
| Q330 | Shaking, confusion, behavioural change, and sweating are signs of high blood sugar |  |  |  |
|------|------------------------------------------------------------------------------------|--|--|--|

#### PART IV: SUMMARY OF DIABETES SELF-CARE ACTIVITIES QUESTIONNAIRE

The questions below ask you about your diabetes self-care activities during the past 7 days. If you were sick during the past 7 days, please think back to the last 7 days that you were not sick.

##### Diet

| S.no | Questions                                                                                                   | Possible response   | Remark |
|------|-------------------------------------------------------------------------------------------------------------|---------------------|--------|
| Q401 | How many of the last seven days have you followed a healthy day's eating plan?                              | -----Number of Days |        |
| Q402 | On average, over the past month, how many DAYS PER WEEK have you followed you're eating plan?               | -----Number of Days |        |
| Q403 | On how many of the last SEVEN DAYS did you eat five or more servings of fruits and vegetables?              | -----Number of Days |        |
| Q404 | On how many of the last seven days did you eat high-fat foods, such as red meat or full-fat dairy products? | -----Number of Days |        |
| Q405 | On how many of the last SEVEN DAYS did you space carbohydrates evenly through the day?                      | -----Number of Days |        |

##### Physical Activity

| S.no | Questions                                                                                                                                                                                      | Possible response   | Remark |
|------|------------------------------------------------------------------------------------------------------------------------------------------------------------------------------------------------|---------------------|--------|
| Q406 | On how many of the last seven days did you participate in at least 30 minutes of physical activity (total minutes of continuous activity, including walking)?                                  | -----Number of Days |        |
| Q407 | On how many of the last seven days did you participate in a specific exercise session (such as swimming, walking, or working) other than what you do around the house or as part of your work? | -----Number of Days |        |

##### Blood Sugar Testing

| S.no | Questions                                                                                        | Possible response   | Remark |
|------|--------------------------------------------------------------------------------------------------|---------------------|--------|
| Q408 | On how many of the last seven days did you test your blood sugar?                                | -----Number of Days |        |
| Q409 | On how many of the last seven days did you test your blood sugar the number of times recommended | -----Number of Days |        |

|  |                              |  |  |
|--|------------------------------|--|--|
|  | by your healthcare provider? |  |  |
|--|------------------------------|--|--|

#### Foot Care

| S.no | Questions                                                                       | Possible response   | Remark |
|------|---------------------------------------------------------------------------------|---------------------|--------|
| Q410 | On how many of the last SEVEN DAYS did you check your feet?                     | -----Number of Days |        |
| Q411 | On how many of the last seven days did you inspect the inside of your shoes?    | -----Number of Days |        |
| Q412 | On how many of the last seven days did you wash your feet?                      | -----Number of Days |        |
| Q413 | On how many of the last seven days did you soak your feet?                      | -----Number of Days |        |
| Q414 | On how many of the last seven days did you dry between your toes after washing? | -----Number of Days |        |

#### Medication

| S.no | Questions                                                                                  | Possible response | Remark |
|------|--------------------------------------------------------------------------------------------|-------------------|--------|
| Q415 | On how many of the last seven days did you take your recommended diabetes medication?      |                   |        |
| Q416 | On how many of the last seven days did you take your recommended insulin injections?       |                   |        |
| Q417 | On how many of the last seven days did you take your recommended number of diabetes pills? |                   |        |

#### Smoking

| S.no | Questions                                                         | Possible response | Remark |
|------|-------------------------------------------------------------------|-------------------|--------|
| Q418 | Have you smoked a cigarette, even a puff, in the past seven days? | Yes<br>No         |        |

### PART V: Self-Care Recommendations (Health Professionals Advice)

#### DIET MANAGEMENT seven

Which of the following has your healthcare team (doctor, nurse, dietitian, or diabetes educator) advised you to do? Please check all that apply.

| S.no | Recommendations (HQuestions | Possible response |    | Remark |
|------|-----------------------------|-------------------|----|--------|
|      |                             | Yes               | No |        |

|     |                                                                             |  |  |  |
|-----|-----------------------------------------------------------------------------|--|--|--|
| 1.1 | Follow a low-fat eating plan                                                |  |  |  |
| 1.2 | Follow a complex carbohydrate diet                                          |  |  |  |
| 1.3 | Reduce the number of calories you eat to lose weight                        |  |  |  |
| 1.4 | Eat lots of food high in dietary fibre                                      |  |  |  |
| 1.5 | Eat lots (at least 5 servings per day) of fruits and vegetables             |  |  |  |
| 1.6 | Eat very few sweets (for example, desserts, non-diet sodas, and candy bars) |  |  |  |
| 1.7 | I have not been given any advice about my diet by my healthcare team        |  |  |  |

**PHYSICAL EXERCISE:** Which of the following has your healthcare team (doctor, nurse, dietitian, or diabetes educator) advised you to do? Please check all that apply.

| S.no | Questions                                                                                                              | Possible response |    | Remark |
|------|------------------------------------------------------------------------------------------------------------------------|-------------------|----|--------|
|      |                                                                                                                        | Yes               | No |        |
| 2.1  | Get low-level exercise (such as walking) daily                                                                         |                   |    |        |
| 2.2  | Exercise continuously for at least 20 minutes, at least 3 times a week                                                 |                   |    |        |
| 2.3  | Fit exercise into your daily routine (for example, take stairs instead of elevators, park a block away and walk, etc.) |                   |    |        |
| 2.4  | Engage in a specific amount, type, duration, and level of exercise                                                     |                   |    |        |
| 2.5  | I have not been given any advice about exercise by my healthcare team                                                  |                   |    |        |

**SUGAR LEVEL:** Which of the following has your healthcare team (doctor, nurse, dietitian, or diabetes educator) advised you to do? Please check all that apply

| S.no | Questions                                                                      | Possible response |    | Remark |
|------|--------------------------------------------------------------------------------|-------------------|----|--------|
|      |                                                                                | Yes               | No |        |
| 3.1  | Test your blood sugar using a drop of blood from your finger and a color chart |                   |    |        |
| 3.2  | Test your blood sugar using a machine to read the results                      |                   |    |        |
| 3.3  | Test your urine for sugar                                                      |                   |    |        |

|     |                                                                                            |  |  |  |
|-----|--------------------------------------------------------------------------------------------|--|--|--|
| 3.4 | I have not been given any advice about my blood or urine sugar level by my healthcare team |  |  |  |
|-----|--------------------------------------------------------------------------------------------|--|--|--|

#### SMOKING I have

| S.no | Questions                                                                                 | Possible response |    | Remark |
|------|-------------------------------------------------------------------------------------------|-------------------|----|--------|
|      |                                                                                           | Yes               | No |        |
| 4.1  | At your last doctor's visit, did anyone ask about your smoking status?                    |                   |    |        |
| 4.2  | If you smoke, at your last doctor's visit, did anyone counsel you about stopping smoking? |                   |    |        |
| 4.3  | Do not smoke. (Never smoke.)                                                              |                   |    |        |
| 4.4  | When did you last smoke a cigarette? never smoked                                         |                   |    |        |
| 4.5  | smoke. When did you last smoke a cigarette? More than two years ago                       |                   |    |        |
| 4.6  | When did you last smoke a cigarette? One to two years ago                                 |                   |    |        |
| 4.7  | When did you last smoke a cigarette? Four to twelve months ago                            |                   |    |        |
| 4.8  | When did you last smoke a cigarette? One to three months ago                              |                   |    |        |
| 4.9  | When did you last smoke a cigarette? Within the last month                                |                   |    |        |
| 4.10 | When did you last smoke a cigarette? Today                                                |                   |    |        |

I have completed the questions. Thank you very much!!!
