# Supplementary material for: Self-care practices and associated factors among type 2 diabetes mellitus patients attending public hospitals in Bale zone, Oromia region, Ethiopia
Source: PeerJ. 2025 Jun 20;13:e19529. doi: 10.7717/peerj.19529 (PMC12184674; doi:10.7717/peerj.19529)
Supplement: Supplemental Information 2 — The variable names, their categories and codes, and the data values for each variable. [file peerj-13-19529-s002.xlsx]

## Sheet: Eshetu SPSS 2024.xlsx T2DM
Q101_Age_of_patients_with_DM_t	Q102_Sex	Q103_Marital_Status	Q103_Marital_Status1_single	Q103_Marital_Status2_marrid	Q103_Marital_Status3_divorced	Q103_Marital_Status4_widowed	Q104_Educational_Status	Q105_Occupation	Q105_Occupation1__governmental_employee	Q105_Occupation2__private_employee	Q105_Occupation3__merchant	Q105_Occupation4__housewife	Q105_Occupation5__farmer	Q105_Occupation6__daily_laborer	Q105_Occupation7__student	Q105_Occupation8__other_specify	Q106_Economic_status_monthly_income	PART_TWO_Clinical_a_related_to_diabetes	Q201_How_long_you_ha_th_diabetes_Mellitus	Q202_Do_you_have_any_diabetic	Q203_If_your_answer_omplications_do_have	Q203_If_your_answer_omplications_do_have1_diabetic_nephropathy	Q203_If_your_answer_omplications_do_have2_diabetic_neuropathy	Q203_If_your_answer_omplications_do_have3_diabetic_retinopathy	Q203_If_your_answer_omplications_do_have4_diabetic_foot_ulcer	Q203_If_your_answer_omplications_do_have5_diabetic_related_heart	Q203_If_your_answer_omplications_do_haveothers_specify	Q204_Have_you_ever_diabetic_he	Q205_If_your_answer_set_health_education	Q205_If_your_answer_set_health_education1_doctors_others_health	Q205_If_your_answer_set_health_education2_mass_media	Q205_If_your_answer_set_health_education3_friends_or_family	Q205_If_your_answer_set_health_educationothers_specify	Q206_Are_you_a_membe_diabetic_association	PART_THREE_Self_ca_Modifiable_lifestyle	Q301_Are_you_aware_health_and_wellness	Q302_Do_you_underst_oving_your_lifestyle	Q303_Are_you_knowled_benefits_of_quitting	Q304_Do_you_know_th_f_excessive_drinking	Q305_Are_you_aware_o_anagement_techniques	Q306_Do_you_underst_r_overall_well_being	Q307_Are_you_knowled_healthy_body_weight	Q308_Do_you_understa_t_throughout_the_day	Q309_Are_you_aware_o_e_for_overall_health	Q310_Do_you_understa_ential_health_issues	Q311_Are_you_knowle_using_sun_protection	Q312_Do_you_understa_and_staying_hydrated	Q313_Are_you_aware_o_e_unprocessed_foods	Q314_Do_you_understa_rtance_of_moderation
69	Male	Married	0	1	0	0	Above grade 12	Employed	1	0	0	0	0	0	0	0	3360		13	Yes	Diabetic retinopathy	0	0	1	0	0	0	Yes	Doctors(others health personal)	1	1	0	0	Yes		Yes	Yes	Yes	No	Yes	Yes	Yes	No	Yes	Yes	No	Yes	Yes	No
46	Male	Married	0	1	0	0	Above grade 12	Employed	0	1	0	0	0	0	0	0	3400		1	No								No	Skip					No		Yes	Yes	Yes	Yes	Yes	Yes	Yes	Yes	Yes	Yes	No	Yes	Yes	Yes
58	Female	Married	0	1	0	0	Above grade 12	Employed	1	0	0	0	0	0	0	0	8000		3	No								No	Skip					No		Yes	Yes	Yes	Yes	Yes	No	Yes	Yes	Yes	Yes	No	Yes	Yes	No
73	Male	Married	0	1	0	0	Primary education /1-8/	Unemployed	0	0	0	0	1	0	0	0	10000		18	No								No	Skip					Yes		Yes	Yes	Yes	Yes	Yes	Yes	Yes	Yes	Yes	Yes	Yes	Yes	Yes	Yes
66	Male	Married	0	1	0	0	Primary education /1-8/	Unemployed	0	0	0	0	1	0	0	0	1000		1	No								Yes	Doctors(others health personal)	1	0	0	0	No		Yes	No	Yes	Yes	Yes	Yes	Yes	Yes	Yes	Yes	Yes	Yes	Yes	Yes
53	Female	Married	0	1	0	0	Primary education /1-8/	Unemployed	0	0	0	1	0	0	0	0	1000		6	Yes	Diabetic-related heart disease	0	0	0	0	1	0	Yes	Doctors(others health personal)	1	0	0	0	Yes		Yes	Yes	Yes	No	Yes	Yes	Yes	Yes	Yes	Yes	No	Yes	No	Yes
56	Female	Married	0	1	0	0	Able to read and write only	Unemployed	0	0	0	1	0	0	0	0	1500		6	No								No	Skip					No		Yes	Yes	Yes	No	No	Yes	Yes	Yes	Yes	Yes	Yes	Yes	Yes	Yes
76	Male	Married	0	1	0	0	Not able to read and write	Employed	0	1	0	0	0	0	0	0	500		15	Yes	Diabetic-related heart disease	0	0	1	0	1	0	Yes	Doctors(others health personal)	1	0	0	0	No		Yes	Yes	Yes	Yes	Yes	Yes	Yes	Yes	Yes	Yes	Yes	Yes	Yes	Yes
75	Male	Married	0	1	0	0	Able to read and write only	Unemployed	0	0	0	0	1	0	0	0	2000		5	Yes	Diabetic retinopathy	0	0	1	0	0	0	Yes	Doctors(others health personal)	1	0	0	0	No		Yes	Yes	Yes	Yes	Yes	No	Yes	Yes	Yes	Yes	Yes	Yes	Yes	Yes
50	Female	Married	0	1	0	0	Primary education /1-8/	Unemployed	0	0	0	1	0	0	0	0	800		4	Yes	Diabetic retinopathy	0	0	1	1	0	0	No	Skip					No		Yes	Yes	Yes	Yes	No	Yes	Yes	Yes	Yes	Yes	Yes	Yes	No	Yes
40	Female	Married	0	1	0	0	Not able to read and write	Unemployed	0	0	0	1	1	0	0	0	1500		13	No								Yes	Doctors(others health personal)	1	0	0	0	No		Yes	Yes	Yes	Yes	Yes	No	Yes	Yes	Yes	Yes	Yes	Yes	Yes	Yes
59	Male	Married	0	1	0	0	Not able to read and write	Unemployed	0	0	0	0	1	0	0	0	1000		12	Yes	Diabetic retinopathy	0	0	1	0	0	1	Yes	Doctors(others health personal)	1	0	0	0	Yes		Yes	Yes	Yes	Yes	No	Yes	Yes	Yes	Yes	Yes	Yes	No	Yes	Yes
46	Male	Married	0	1	0	0	Able to read and write only	Other Specify	0	0	1	0	0	0	0	0	6000		2	No								Yes	Doctors(others health personal)	1	0	0	0	No		Yes	Yes	No	Yes	Yes	Yes	Yes	Yes	Yes	Yes	Yes	Yes	Yes	Yes
60	Male	Married	0	1	0	0	Not able to read and write	Other Specify	1	0	0	0	0	0	0	0	8017		5	Yes	Others(specify)	0	0	0	0	0	1	Yes	Doctors(others health personal)	1	0	0	0	No		Yes	Yes	Yes	Yes	Yes	Yes	No	Yes	Yes	Yes	No	Yes	Yes	Yes
50	Female	Married	0	1	0	0	Above grade 12	Unemployed	0	0	0	1	0	0	0	0	6000		2	No								Yes	Doctors(others health personal)	1	0	0	0	No		No	No	Yes	Yes	No	Yes	Yes	Yes	Yes	Yes	No	Yes	Yes	No
28	Female	Married	0	1	0	0	Not able to read and write	Unemployed	0	0	0	1	0	0	0	0	1200		10	Yes	Diabetic-related heart disease	0	0	0	0	1	1	Yes	Doctors(others health personal)	1	0	0	0	No		Yes	Yes	Yes	Yes	No	Yes	Yes	Yes	Yes	Yes	No	Yes	Yes	Yes
35	Male	Married	0	1	0	0	Able to read and write only	Other Specify	0	0	1	0	1	0	0	0	2000		6	No								Yes	Doctors(others health personal)	1	1	1	0	No		Yes	Yes	Yes	Yes	No	Yes	Yes	Yes	Yes	Yes	Yes	Yes	Yes	Yes
44	Male	Married	0	1	0	0	Able to read and write only	Unemployed	0	0	0	0	1	0	0	0	1000		6	No								Yes	Doctors(others health personal)	1	1	0	0	No		Yes	Yes	Yes	Yes	No	No	Yes	Yes	Yes	Yes	Yes	Yes	Yes	Yes
32	Male	Married	0	1	0	0	Primary education /1-8/	Unemployed	0	0	0	0	1	0	0	0	800		7	Yes	Others(specify)	0	0	0	0	0	1	Yes	Mass media	1	1	0	0	No		Yes	Yes	Yes	Yes	Yes	Yes	Yes	Yes	Yes	Yes	Yes	Yes	Yes	Yes
30	Female	Married	0	1	0	0	Primary education /1-8/	Unemployed	0	0	0	1	1	0	0	0	1000		1	No								Yes	Doctors(others health personal)	1	0	0	0	No		Yes	Yes	Yes	No	No	Yes	Yes	Yes	Yes	Yes	Yes	No	Yes	Yes
40	Male	Married	0	1	0	0	Able to read and write only	Unemployed	0	0	0	0	1	0	0	0	1500		10	Yes	Others(specify)	0	0	0	0	0	1	Yes	Doctors(others health personal)	1	0	0	0	No		Yes	Yes	Yes	Yes	Yes	Yes	Yes	Yes	Yes	Yes	No	Yes	Yes	Yes
48	Male	Married	0	1	0	0	Primary education /1-8/	Employed	0	1	0	0	0	0	0	0	1500		8	Yes	Others(specify)	0	0	0	0	0	1	Yes	Doctors(others health personal)	1	0	0	0	No		Yes	Yes	Yes	Yes	Yes	Yes	Yes	Yes	Yes	Yes	Yes	Yes	Yes	No
66	Male	Married	0	1	0	0	Primary education /1-8/	Employed	1	0	0	0	0	0	0	0	1600		6	Yes	Diabetic neuropathy	0	1	0	0	0	0	No	Skip					No		Yes	Yes	Yes	Yes	Yes	Yes	Yes	Yes	Yes	Yes	Yes	Yes	Yes	Yes
70	Male	Married	0	1	0	0	Secondary education /9-12/	Employed	0	1	0	0	0	0	0	0	200		4	No								Yes	Doctors(others health personal)	1	0	0	0	No		Yes	Yes	Yes	Yes	Yes	Yes	Yes	Yes	Yes	Yes	No	Yes	Yes	No
55	Female	Married	0	1	0	0	Primary education /1-8/	Unemployed	0	0	0	1	0	0	0	0	6000		3	No								Yes	Doctors(others health personal)	1	0	0	0	Yes		Yes	No	Yes	Yes	Yes	No	Yes	No	Yes	Yes	No	No	Yes	No
63	Male	Married	0	1	0	0	Primary education /1-8/	Unemployed	0	0	0	0	1	0	0	0	1000		3	Yes	Diabetic neuropathy	0	1	0	0	0	0	No	Skip					No		Yes	Yes	Yes	Yes	Yes	Yes	Yes	Yes	Yes	Yes	Yes	Yes	No	Yes
70	Male	Married	0	1	0	0	Able to read and write only	Unemployed	0	0	0	0	1	0	0	0	2000		16	Yes	Diabetic foot ulcer	0	0	0	1	0	0	Yes	Doctors(others health personal)	1	0	0	0	No		No	No	Yes	Yes	Yes	Yes	Yes	Yes	Yes	Yes	Yes	No	No	No
70	Female	Divorced	0	0	1	0	Primary education /1-8/	Employed	0	1	0	0	0	0	0	0	2000		7	Yes	Others(specify)	0	0	0	0	0	1	Yes	Doctors(others health personal)	1	0	0	0	Yes		No	Yes	No	Yes	Yes	Yes	Yes	Yes	Yes	Yes	Yes	Yes	Yes	Yes
64	Male	Married	0	1	0	0	Not able to read and write	Employed	0	0	0	0	1	0	0	0	790		3	No								Yes	Doctors(others health personal)	1	0	0	0	No		Yes	Yes	Yes	Yes	Yes	Yes	No	Yes	Yes	Yes	Yes	Yes	Yes	No
40	Male	Married	0	1	0	0	Primary education /1-8/	Other Specify	0	0	1	0	1	0	0	0	1000		5	No								Yes	Doctors(others health personal)	1	1	0	0	Yes		Yes	Yes	Yes	Yes	Yes	Yes	Yes	Yes	Yes	Yes	Yes	Yes	Yes	No
65	Female	Married	0	1	0	0	Primary education /1-8/	Unemployed	0	0	0	1	1	0	0	0	1200		4	No								Yes	Doctors(others health personal)	1	0	0	0	No		Yes	Yes	Yes	Yes	Yes	Yes	Yes	Yes	Yes	Yes	Yes	Yes	Yes	Yes
72	Male	Married	0	1	0	0	Not able to read and write	Unemployed	0	0	0	0	1	0	0	0	1500		7	Yes	Diabetic retinopathy	0	0	1	0	0	0	Yes	Doctors(others health personal)	1	0	0	0	Yes		Yes	Yes	Yes	Yes	No	No	Yes	Yes	Yes	Yes	Yes	Yes	Yes	Yes
19	Female	Single	1	0	0	0	Primary education /1-8/	Unemployed	0	0	0	0	0	0	0	1	500		5	No								Yes	Doctors(others health personal)	1	0	0	0	No		Yes	Yes	Yes	No	No	No	Yes	Yes	Yes	Yes	No	Yes	Yes	Yes
33	Male	Married	0	1	0	0	Not able to read and write	Unemployed	0	0	0	0	1	0	0	0	1000		3	Yes	Diabetic nephropathy	1	0	0	0	0	1	Yes	Doctors(others health personal)	1	1	1	0	No		Yes	Yes	Yes	Yes	Yes	Yes	Yes	Yes	Yes	Yes	No	No	Yes	Yes
20	Female	Divorced	0	0	1	0	Able to read and write only	Unemployed	0	0	0	0	1	1	0	0	500		5	No								Yes	Doctors(others health personal)	1	0	1	0	No		Yes	Yes	Yes	Yes	Yes	Yes	Yes	Yes	Yes	Yes	Yes	Yes	Yes	Yes
38	Female	Married	0	1	0	0	Secondary education /9-12/	Unemployed	0	0	0	1	1	0	0	0	1500		9	Yes	Others(specify)	0	0	0	0	0	1	Yes	Doctors(others health personal)	1	1	0	0	Yes		Yes	Yes	Yes	Yes	Yes	Yes	Yes	Yes	Yes	Yes	Yes	Yes	Yes	Yes
65	Female	Married	0	1	0	0	Not able to read and write	Unemployed	0	0	0	1	1	0	0	0	1000		5	Yes	Diabetic nephropathy	1	0	1	0	0	0	Yes	Doctors(others health personal)	1	0	1	0	No		Yes	Yes	Yes	Yes	Yes	Yes	Yes	Yes	No	Yes	Yes	Yes	Yes	Yes
53	Male	Married	0	1	0	0	Secondary education /9-12/	Unemployed	1	0	0	0	1	0	0	0	5000		29	Yes	Diabetic retinopathy	0	0	1	0	0	0	Yes	Doctors(others health personal)	1	1	1	0	No		Yes	Yes	Yes	Yes	Yes	Yes	Yes	Yes	Yes	Yes	Yes	Yes	Yes	Yes
60	Male	Married	0	1	0	0	Primary education /1-8/	Other Specify	1	0	0	0	0	0	0	0	1000		5	No								No	Skip					No		Yes	Yes	Yes	Yes	Yes	No	Yes	Yes	No	No	No	No	Yes	Yes
37	Female	Married	0	1	0	0	Secondary education /9-12/	Unemployed	1	0	0	0	0	0	0	0	5000		6	Yes	Others(specify)	0	0	0	0	0	1	Yes	Doctors(others health personal)	1	0	0	0	No		No	No	Yes	No	Yes	No	No	No	No	Yes	Yes	No	Yes	No
22	Male	Single	1	0	0	0	Secondary education /9-12/	Other Specify	0	0	0	0	0	1	0	0	1000		15	Yes	Diabetic foot ulcer	0	0	0	1	0	0	Yes	Doctors(others health personal)	1	0	0	0	No		Yes	No	No	Yes	Yes	Yes	No	Yes	Yes	Yes	Yes	Yes	Yes	Yes
32	Female	Married	0	1	0	0	Above grade 12	Employed	1	0	0	0	0	0	0	0	20000		2	No								Yes	Doctors(others health personal)	1	0	0	0	No		No	No	Yes	No	Yes	No	No	Yes	No	Yes	Yes	Yes	Yes	Yes
32	Female	Married	0	1	0	0	Able to read and write only	Unemployed	0	0	0	1	0	0	0	0	0		15	No								Yes	Doctors(others health personal)	1	0	0	0	No		No	No	Yes	No	Yes	No	No	Yes	No	Yes	Yes	Yes	Yes	Yes
48	Female	Widowed	0	0	0	1	Able to read and write only	Employed	0	1	0	0	0	0	0	0	1500		8	Yes	Others(specify)	0	0	0	0	0	1	Yes	Doctors(others health personal)	1	0	0	0	No		Yes	Yes	Yes	No	No	No	Yes	No	Yes	Yes	Yes	Yes	Yes	Yes
52	Male	Married	0	1	0	0	Primary education /1-8/	Other Specify	0	0	1	0	0	0	0	0	300		11	No								Yes	Doctors(others health personal)	1	0	0	0	No		No	No	Yes	No	Yes	Yes	No	Yes	No	Yes	Yes	Yes	Yes	Yes
60	Male	Married	0	1	0	0	Secondary education /9-12/	Other Specify	0	0	1	0	0	0	0	0	7000		8	Yes	Diabetic retinopathy	0	0	1	0	0	0	Yes	Doctors(others health personal)	1	0	0	0	No		Yes	Yes	Yes	No	Yes	No	No	Yes	Yes	Yes	Yes	Yes	Yes	No
79	Male	Married	0	1	0	0	Primary education /1-8/	Other Specify	0	0	0	0	0	0	0	1	0		13	Yes	Diabetic neuropathy	0	1	0	0	0	0	Yes	Others(specify)	0	0	0	1	No		No	Yes	Yes	Yes	Yes	Yes	Yes	Yes	Yes	Yes	Yes	Yes	Yes	Yes
66	Male	Married	0	1	0	0	Above grade 12	Employed	0	1	0	0	0	0	0	0	5000		25	Yes	Diabetic retinopathy	0	0	1	0	0	0	Yes	Doctors(others health personal)	1	0	0	0	No		Yes	Yes	Yes	Yes	Yes	Yes	Yes	Yes	Yes	Yes	Yes	Yes	Yes	Yes
73	Male	Married	0	1	0	0	Secondary education /9-12/	Employed	1	0	0	0	0	0	0	0	3000		20	Yes	Diabetic neuropathy	0	1	0	0	0	0	Yes	Doctors(others health personal)	1	0	0	0	Yes		Yes	Yes	Yes	Yes	Yes	Yes	Yes	Yes	Yes	Yes	Yes	Yes	Yes	Yes
29	Male	Single	1	0	0	0	Secondary education /9-12/	Employed	1	0	0	0	0	0	0	0	1000		4	Yes	Diabetic retinopathy	0	0	1	1	0	0	Yes	Doctors(others health personal)	1	0	0	0	No		Yes	Yes	Yes	No	Yes	No	No	Yes	Yes	No	Yes	Yes	Yes	No
54	Male	Married	0	1	0	0	Primary education /1-8/	Employed	0	1	0	0	0	0	0	0	1600		10	Yes	Diabetic nephropathy	1	0	0	0	0	0	Yes	Doctors(others health personal)	1	1	0	0	Yes		Yes	Yes	Yes	No	Yes	No	No	Yes	Yes	Yes	Yes	Yes	Yes	No
69	Male	Married	0	1	0	0	Able to read and write only	Unemployed	0	0	0	0	1	0	0	0	1000		10	Yes	Diabetic nephropathy	1	0	0	0	0	0	Yes	Doctors(others health personal)	1	0	0	0	No		Yes	Yes	Yes	Yes	Yes	Yes	Yes	Yes	Yes	Yes	Yes	Yes	No	Yes
59	Male	Married	0	1	0	0	Secondary education /9-12/	Employed	1	0	0	0	0	0	0	0	2000		8	No								Yes	Doctors(others health personal)	1	1	1	0	No		Yes	Yes	Yes	Yes	Yes	Yes	Yes	Yes	Yes	Yes	Yes	Yes	Yes	Yes
40	Female	Married	0	1	0	0	Primary education /1-8/	Unemployed	0	0	0	1	0	0	0	1	1500		3	No								Yes	Doctors(others health personal)	1	1	1	0	No		Yes	Yes	Yes	Yes	Yes	Yes	Yes	Yes	Yes	Yes	Yes	Yes	Yes	Yes
28	Female	Married	0	1	0	0	Not able to read and write	Unemployed	0	0	0	0	1	0	0	0	800		1	No								Yes	Doctors(others health personal)	1	1	0	0	No		Yes	Yes	Yes	Yes	Yes	Yes	Yes	Yes	Yes	Yes	No	Yes	Yes	Yes
55	Female	Married	0	1	0	0	Not able to read and write	Unemployed	0	0	0	0	1	0	0	0	1000		10	No								Yes	Doctors(others health personal)	1	0	0	0	No		No	Yes	No	Yes	Yes	Yes	Yes	Yes	Yes	Yes	Yes	Yes	Yes	Yes
20	Female	Single	1	0	0	0	Secondary education /9-12/	Unemployed	0	0	0	0	0	0	1	0	500		4	No								Yes	Doctors(others health personal)	1	1	1	0	No		Yes	Yes	Yes	Yes	Yes	Yes	Yes	Yes	Yes	Yes	Yes	Yes	Yes	Yes
31	Male	Married	0	1	0	0	Not able to read and write	Other Specify	0	0	0	0	0	1	0	0	0		5	Yes	Diabetic foot ulcer	0	0	0	1	0	0	Yes	Doctors(others health personal)	1	0	0	0	No		Yes	Yes	Yes	No	Yes	No	No	Yes	Yes	Yes	Yes	No	Yes	No
45	Female	Married	0	1	0	0	Secondary education /9-12/	Other Specify	0	0	1	0	0	0	0	0	300		1	No								Yes	Doctors(others health personal)	1	0	0	0	No		Yes	Yes	Yes	Yes	Yes	Yes	Yes	Yes	Yes	Yes	No	Yes	Yes	No
80	Female	Widowed	0	0	0	1	Not able to read and write	Unemployed	0	0	0	0	0	0	0	1	50		1	Yes	Diabetic nephropathy	1	1	0	0	0	0	No	Skip					No		Yes	Yes	Yes	Yes	Yes	Yes	Yes	Yes	Yes	Yes	Yes	No	Yes	Yes
40	Female	Married	0	1	0	0	Not able to read and write	Unemployed	0	0	0	1	0	0	0	0	200		1	Yes	Others(specify)	0	0	0	0	0	1	Yes	Mass media	0	1	0	0	No		Yes	Yes	Yes	Yes	Yes	Yes	Yes	Yes	Yes	Yes	Yes	Yes	No	Yes
78	Female	Widowed	0	0	0	1	Not able to read and write	Unemployed	0	0	0	0	0	1	0	0	200		20	Yes	Diabetic foot ulcer	0	0	0	1	0	0	No	Skip					No		No	No	Yes	Yes	Yes	Yes	No	Yes	Yes	Yes	Yes	Yes	Yes	Yes
56	Female	Married	0	1	0	0	Not able to read and write	Unemployed	0	0	0	1	0	0	0	0	0		12	No								Yes	Doctors(others health personal)	1	0	0	0	No		Yes	Yes	Yes	Yes	No	Yes	Yes	Yes	Yes	Yes	No	No	Yes	Yes
82	Male	Married	0	1	0	0	Not able to read and write	Unemployed	0	0	0	0	0	0	0	1	6000		7	Yes	Diabetic retinopathy	0	0	1	0	0	1	Yes	Doctors(others health personal)	1	1	0	0	No		Yes	Yes	No	Yes	Yes	Yes	No	Yes	Yes	No	Yes	Yes	Yes	Yes
52	Male	Married	0	1	0	0	Able to read and write only	Employed	0	1	0	0	0	0	0	1	5600		4	Yes	Others(specify)	0	0	1	0	0	1	Yes	Doctors(others health personal)	1	1	1	0	No		No	Yes	Yes	Yes	Yes	Yes	No	Yes	No	Yes	Yes	No	Yes	No
48	Male	Married	0	1	0	0	Not able to read and write	Unemployed	0	0	0	0	1	0	0	0	3000		2	No								Yes	Doctors(others health personal)	1	0	0	0	No		Yes	Yes	Yes	No	No	Yes	Yes	Yes	Yes	No	No	No	No	No
25	Female	Married	0	1	0	0	Not able to read and write	Unemployed	0	0	0	1	0	0	0	0	2000		3	No								Yes	Doctors(others health personal)	1	1	1	0	No		Yes	Yes	Yes	Yes	Yes	Yes	Yes	Yes	Yes	Yes	Yes	Yes	Yes	Yes
45	Male	Married	0	1	0	0	Primary education /1-8/	Unemployed	0	0	0	0	1	0	0	0	1000		13	Yes	Diabetic foot ulcer	0	0	0	1	0	0	Yes	Doctors(others health personal)	1	1	1	0	No		Yes	Yes	Yes	Yes	No	No	Yes	Yes	Yes	Yes	Yes	Yes	Yes	Yes
50	Female	Married	0	1	0	0	Above grade 12	Other Specify	1	0	0	0	0	0	0	0	3000		14	Yes	Diabetic nephropathy	1	0	0	0	0	0	Yes	Doctors(others health personal)	1	1	1	0	No		Yes	Yes	Yes	Yes	Yes	Yes	Yes	Yes	Yes	Yes	Yes	Yes	Yes	Yes
50	Female	Married	0	1	0	0	Not able to read and write	Unemployed	0	0	0	1	0	0	0	0	1000		6	No								Yes	Doctors(others health personal)	1	0	1	0	No		Yes	No	Yes	Yes	No	No	Yes	No	Yes	Yes	Yes	Yes	Yes	Yes
33	Female	Married	0	1	0	0	Primary education /1-8/	Unemployed	0	0	0	1	0	0	0	0	1500		3	No								Yes	Doctors(others health personal)	1	1	0	0	No		Yes	Yes	Yes	Yes	Yes	Yes	Yes	Yes	Yes	Yes	Yes	Yes	Yes	Yes
31	Male	Single	1	0	0	0	Not able to read and write	Unemployed	0	0	0	0	1	0	0	0	1000		1	No								Yes	Doctors(others health personal)	1	0	1	0	No		Yes	Yes	Yes	Yes	No	No	No	Yes	No	Yes	No	Yes	Yes	Yes
60	Male	Married	0	1	0	0	Above grade 12	Employed	1	0	0	0	0	0	0	0	10000		5	Yes	Others(specify)	0	0	0	0	0	1	Yes	Doctors(others health personal)	1	1	0	0	No		Yes	Yes	Yes	Yes	Yes	Yes	Yes	Yes	Yes	Yes	Yes	Yes	Yes	Yes
60	Female	Divorced	0	0	1	0	Not able to read and write	Unemployed	0	0	0	1	0	0	0	0	2000		10	Yes	Others(specify)	0	0	0	0	0	1	No	Skip					No		No	No	Yes	Yes	No	No	No	No	Yes	Yes	No	Yes	No	No
29	Male	Married	0	1	0	0	Able to read and write only	Unemployed	0	0	0	0	1	0	0	0	7000		5	Yes	Diabetic retinopathy	0	0	1	0	0	0	Yes	Doctors(others health personal)	1	0	1	0	No		No	No	Yes	Yes	No	Yes	No	No	Yes	No	No	No	No	No
40	Female	Married	0	1	0	0	Not able to read and write	Unemployed	0	0	0	1	0	0	0	0	1000		1	No								Yes	Doctors(others health personal)	1	0	0	0	No		Yes	Yes	Yes	Yes	Yes	Yes	Yes	Yes	Yes	Yes	Yes	Yes	Yes	Yes
30	Female	Married	0	1	0	0	Not able to read and write	Unemployed	0	0	0	1	0	0	0	0	5000		7	Yes	Diabetic nephropathy	1	0	0	0	0	0	No	Skip					No		Yes	Yes	Yes	Yes	Yes	No	Yes	Yes	Yes	Yes	Yes	Yes	No	Yes
52	Female	Married	0	1	0	0	Secondary education /9-12/	Other Specify	0	0	1	0	0	0	0	0	500		1	Yes	Others(specify)	0	0	0	0	0	1	Yes	Doctors(others health personal)	1	0	0	0	No		Yes	Yes	Yes	No	Yes	Yes	Yes	Yes	Yes	Yes	No	Yes	Yes	Yes
76	Male	Married	0	1	0	0	Above grade 12	Unemployed	1	0	0	0	0	0	0	0	12000		31	Yes	Others(specify)	1	0	1	0	0	1	Yes	Mass media	0	1	1	1	No		Yes	Yes	Yes	Yes	Yes	Yes	Yes	Yes	Yes	Yes	Yes	Yes	Yes	Yes
73	Male	Married	0	1	0	0	Primary education /1-8/	Unemployed	0	0	0	0	1	0	0	0	15000		6	Yes	Others(specify)	1	0	1	0	0	1	Yes	Others(specify)	1	0	0	1	No		Yes	Yes	Yes	Yes	Yes	Yes	Yes	No	Yes	Yes	Yes	Yes	Yes	Yes
67	Male	Married	0	1	0	0	Primary education /1-8/	Unemployed	0	0	0	0	1	0	0	0	10000		9	Yes	Diabetic retinopathy	0	0	1	0	0	1	Yes	Doctors(others health personal)	1	0	0	0	Yes		Yes	Yes	Yes	Yes	Yes	Yes	Yes	Yes	Yes	Yes	Yes	Yes	Yes	Yes
90	Male	Married	0	1	0	0	Primary education /1-8/	Unemployed	0	0	0	0	1	0	0	0	17000		7	Yes	Diabetic foot ulcer	0	0	1	1	0	1	Yes	Doctors(others health personal)	1	1	1	0	No		Yes	Yes	Yes	Yes	Yes	Yes	Yes	No	Yes	Yes	Yes	Yes	No	No
70	Female	Married	0	1	0	0	Not able to read and write	Unemployed	0	0	0	0	0	0	0	1	8000		5	Yes	Diabetic retinopathy	0	0	1	0	0	1	Yes	Doctors(others health personal)	1	0	1	0	No		No	No	Yes	Yes	Yes	Yes	No	No	No	No	Yes	Yes	No	Yes
56	Female	Married	0	1	0	0	Able to read and write only	Unemployed	0	0	0	0	1	0	0	0	6000		8	Yes	Others(specify)	0	0	1	0	0	1	Yes	Doctors(others health personal)	1	0	0	0	No		Yes	Yes	Yes	Yes	Yes	Yes	Yes	Yes	No	Yes	No	No	Yes	Yes
48	Male	Married	0	1	0	0	Primary education /1-8/	Unemployed	0	0	0	0	0	0	0	1	9000		3	Yes	Others(specify)	0	0	0	0	0	1	Yes	Doctors(others health personal)	1	0	0	0	No		Yes	Yes	Yes	Yes	No	Yes	Yes	No	Yes	Yes	No	Yes	No	Yes
25	Male	Married	0	1	0	0	Primary education /1-8/	Employed	0	1	0	0	0	0	0	0	2500		3	No								Yes	Doctors(others health personal)	1	0	0	0	No		Yes	Yes	Yes	Yes	Yes	Yes	Yes	Yes	Yes	No	No	Yes	Yes	Yes
43	Male	Married	0	1	0	0	Not able to read and write	Employed	0	1	0	0	0	0	0	0	1500		6	No								Yes	Mass media	1	1	0	0	No		Yes	Yes	Yes	No	Yes	Yes	Yes	Yes	Yes	Yes	No	Yes	Yes	Yes
44	Female	Married	0	1	0	0	Able to read and write only	Unemployed	0	0	0	1	0	0	0	0	8700		3	Yes	Diabetic-related heart disease	0	0	0	0	1	0	Yes	Doctors(others health personal)	1	0	0	0	No		Yes	Yes	Yes	Yes	Yes	Yes	Yes	Yes	Yes	Yes	No	Yes	Yes	Yes
52	Male	Married	0	1	0	0	Able to read and write only	Other Specify	0	0	1	0	0	0	0	0	2000		2	Yes	Diabetic-related heart disease	0	0	0	0	1	0	Yes	Mass media	0	1	0	0	No		Yes	Yes	Yes	Yes	No	Yes	Yes	Yes	Yes	Yes	No	Yes	Yes	Yes
53	Female	Married	0	1	0	0	Not able to read and write	Unemployed	0	0	0	0	1	0	0	0	10000		7	Yes	Diabetic retinopathy	0	0	1	0	0	1	Yes	Doctors(others health personal)	1	0	0	0	No		Yes	No	Yes	Yes	No	No	No	Yes	Yes	Yes	Yes	Yes	Yes	No
35	Female	Married	0	1	0	0	Not able to read and write	Other Specify	0	0	1	0	0	0	0	0	5500		1	Yes	Others(specify)	0	0	0	0	0	1	Yes	Doctors(others health personal)	1	0	0	0	No		Yes	Yes	Yes	No	No	Yes	Yes	Yes	Yes	Yes	Yes	Yes	Yes	Yes
45	Male	Married	0	1	0	0	Primary education /1-8/	Other Specify	0	0	1	0	0	0	0	0	2000		2	No								Yes	Doctors(others health personal)	1	1	1	0	No		Yes	Yes	Yes	Yes	Yes	Yes	Yes	Yes	Yes	Yes	Yes	Yes	Yes	Yes
40	Female	Married	0	1	0	0	Primary education /1-8/	Unemployed	0	0	0	0	1	0	0	1	1000		11	No								Yes	Doctors(others health personal)	1	0	1	0	No		Yes	No	No	No	No	No	Yes	Yes	No	Yes	No	Yes	Yes	Yes
30	Male	Married	0	1	0	0	Secondary education /9-12/	Other Specify	0	0	1	0	0	0	0	0	3500		1	No								Yes	Doctors(others health personal)	1	0	0	0	No		Yes	Yes	Yes	Yes	Yes	Yes	Yes	Yes	Yes	Yes	Yes	Yes	Yes	Yes
40	Male	Married	0	1	0	0	Primary education /1-8/	Unemployed	0	0	1	0	1	0	0	0	1000		3	No								Yes	Doctors(others health personal)	1	0	1	0	No		Yes	Yes	Yes	Yes	No	No	Yes	Yes	Yes	Yes	No	Yes	Yes	Yes
40	Female	Married	0	1	0	0	Not able to read and write	Other Specify	0	0	1	0	0	0	0	0	1500		10	No								Yes	Friends or family	1	1	1	0	No		Yes	Yes	Yes	Yes	Yes	Yes	Yes	Yes	Yes	Yes	Yes	Yes	Yes	Yes
54	Male	Married	0	1	0	0	Not able to read and write	Unemployed	0	0	0	0	1	0	0	0	2000		8	Yes	Others(specify)	0	0	0	0	0	1	Yes	Doctors(others health personal)	1	0	0	0	No		Yes	Yes	Yes	No	No	No	Yes	Yes	No	Yes	No	Yes	Yes	Yes
45	Female	Married	0	1	0	0	Primary education /1-8/	Unemployed	0	0	0	1	0	0	0	0	1000		5	No								Yes	Doctors(others health personal)	1	0	0	0	No		Yes	Yes	Yes	No	No	No	Yes	Yes	Yes	Yes	No	Yes	Yes	Yes
80	Male	Married	0	1	0	0	Primary education /1-8/	Unemployed	0	0	0	0	1	0	0	0	150000		10	Yes	Diabetic neuropathy	0	1	0	0	0	0	Yes	Doctors(others health personal)	1	0	0	0	No		Yes	Yes	Yes	Yes	Yes	Yes	Yes	Yes	Yes	Yes	No	Yes	No	Yes
52	Male	Married	0	1	0	0	Primary education /1-8/	Unemployed	0	0	0	0	0	0	0	1	9000		2	No								Yes	Doctors(others health personal)	1	0	0	0	No		Yes	Yes	Yes	Yes	No	No	Yes	Yes	Yes	Yes	Yes	Yes	Yes	Yes
69	Male	Married	0	1	0	0	Above grade 12	Employed	1	0	0	0	0	0	0	0	16800		7	Yes	Diabetic-related heart disease	0	0	0	0	1	0	Yes	Doctors(others health personal)	1	0	0	0	Yes		Yes	Yes	Yes	Yes	Yes	Yes	Yes	Yes	Yes	Yes	Yes	Yes	Yes	Yes
45	Male	Married	0	1	0	0	Secondary education /9-12/	Unemployed	0	1	0	0	0	0	0	0	30000		3	Yes	Diabetic neuropathy	0	1	0	0	0	0	Yes	Doctors(others health personal)	1	0	0	0	Yes		Yes	Yes	Yes	Yes	Yes	Yes	Yes	Yes	Yes	Yes	Yes	Yes	Yes	Yes
77	Female	Married	0	1	0	0	Not able to read and write	Unemployed	0	0	0	1	0	0	0	0	100		2	No								No	Skip					No		Yes	Yes	No	Yes	Yes	Yes	Yes	Yes	Yes	Yes	Yes	Yes	Yes	Yes
27	Female	Single	1	0	0	0	Primary education /1-8/	Unemployed	0	0	0	0	0	0	1	0	0		2	No								Yes	Doctors(others health personal)	1	0	0	0	No		Yes	Yes	Yes	Yes	Yes	Yes	Yes	Yes	Yes	Yes	Yes	Yes	Yes	Yes
48	Male	Single	0	1	0	0	Primary education /1-8/	Unemployed	1	0	0	0	1	0	0	0	4706		8	Yes	Others(specify)	0	0	1	0	0	1	Yes	Doctors(others health personal)	1	1	0	0	No		Yes	Yes	Yes	Yes	Yes	Yes	Yes	No	Yes	Yes	Yes	Yes	Yes	Yes
52	Male	Married	0	1	0	0	Secondary education /9-12/	Employed	1	0	0	0	0	0	0	0	4000		3	Yes	Others(specify)	0	0	0	0	0	1	Yes	Mass media	0	1	0	0	No		Yes	Yes	Yes	Yes	Yes	Yes	Yes	Yes	Yes	Yes	Yes	Yes	No	Yes
60	Male	Married	0	1	0	0	Secondary education /9-12/	Other Specify	0	1	0	0	0	0	0	0	3000		5	Yes	Others(specify)	0	0	0	0	0	1	Yes	Doctors(others health personal)	1	0	0	0	No		Yes	Yes	Yes	Yes	Yes	Yes	Yes	Yes	Yes	Yes	No	Yes	Yes	Yes
50	Male	Single	0	1	0	0	Primary education /1-8/	Unemployed	0	0	0	0	1	0	0	0	5000		4	No								Yes	Doctors(others health personal)	1	0	0	0	Yes		Yes	Yes	Yes	Yes	Yes	Yes	Yes	Yes	Yes	Yes	Yes	Yes	Yes	Yes
60	Female	Married	0	1	0	0	Not able to read and write	Unemployed	0	0	0	1	0	0	0	0	200		4	Yes	Diabetic retinopathy	0	0	1	0	0	0	No	Skip					No		Yes	No	Yes	Yes	Yes	No	Yes	No	Yes	Yes	Yes	Yes	No	No
70	Male	Married	0	1	0	0	Not able to read and write	Unemployed	0	0	0	0	1	0	0	0	1000		15	Yes	Diabetic neuropathy	0	1	0	0	0	0	Yes	Doctors(others health personal)	1	0	0	0	No		Yes	Yes	Yes	Yes	Yes	Yes	Yes	Yes	Yes	Yes	Yes	Yes	No	Yes
82	Male	Single	0	1	0	0	Primary education /1-8/	Employed	1	0	0	0	0	0	0	0	2200		3	Yes	Diabetic nephropathy	1	0	0	1	1	0	No	Skip					No		No	No	Yes	No	Yes	Yes	Yes	No	Yes	Yes	Yes	Yes	Yes	Yes
67	Male	Married	0	1	0	0	Above grade 12	Employed	1	0	0	0	0	0	0	0	4000		8	Yes	Others(specify)	0	0	0	0	0	1	Yes	Doctors(others health personal)	1	0	0	0	No		Yes	Yes	Yes	Yes	Yes	Yes	Yes	Yes	Yes	Yes	Yes	Yes	No	Yes
80	Male	Married	0	1	0	0	Secondary education /9-12/	Other Specify	0	0	0	0	0	0	0	1	2000		1	No								Yes	Doctors(others health personal)	1	0	0	0	No		No	Yes	Yes	Yes	Yes	Yes	Yes	Yes	Yes	Yes	Yes	Yes	Yes	No
40	Male	Single	0	1	0	0	Primary education /1-8/	Unemployed	0	0	0	0	1	0	0	0	150000		3	Yes	Others(specify)	0	0	0	0	0	1	Yes	Doctors(others health personal)	1	0	0	0	No		Yes	Yes	Yes	No	Yes	Yes	Yes	Yes	Yes	Yes	Yes	Yes	Yes	Yes
73	Female	Married	0	1	0	0	Primary education /1-8/	Unemployed	0	0	0	1	0	0	0	0	3500		12	No								Yes	Friends or family	1	0	1	0	No		Yes	Yes	Yes	Yes	Yes	Yes	Yes	Yes	Yes	Yes	Yes	Yes	Yes	Yes
53	Male	Married	0	1	0	0	Above grade 12	Employed	1	0	0	0	0	0	0	0	4000		8	No								Yes	Friends or family	1	1	1	0	No		Yes	Yes	Yes	Yes	Yes	Yes	Yes	Yes	Yes	Yes	Yes	Yes	Yes	Yes
58	Male	Single	0	1	0	0	Secondary education /9-12/	Other Specify	0	0	1	0	0	0	0	0	4500		6	No								Yes	Friends or family	1	0	1	0	No		Yes	Yes	Yes	Yes	Yes	Yes	Yes	Yes	Yes	Yes	Yes	Yes	Yes	Yes
20	Male	Single	1	0	0	0	Secondary education /9-12/	Other Specify	0	0	0	0	0	0	0	1	500		1	No								Yes	Friends or family	1	0	1	0	No		Yes	Yes	Yes	Yes	Yes	Yes	Yes	Yes	Yes	Yes	Yes	Yes	Yes	Yes
45	Male	Single	0	1	0	0	Secondary education /9-12/	Unemployed	0	0	1	0	1	0	0	0	4000		3	No								Yes	Friends or family	1	1	1	0	No		Yes	Yes	Yes	Yes	Yes	Yes	Yes	Yes	Yes	Yes	Yes	Yes	Yes	Yes
18	Female	Single	1	0	0	0	Primary education /1-8/	Unemployed	0	0	0	0	0	0	1	0	500		5	No								Yes	Mass media	1	1	1	0	No		Yes	Yes	Yes	Yes	Yes	Yes	Yes	Yes	Yes	Yes	Yes	Yes	Yes	Yes
28	Male	Married	0	1	0	0	Primary education /1-8/	Unemployed	0	0	0	0	1	0	0	0	1500		5	No								Yes	Doctors(others health personal)	1	0	1	0	No		Yes	Yes	Yes	Yes	Yes	Yes	Yes	Yes	Yes	Yes	Yes	Yes	Yes	Yes
22	Female	Married	0	1	0	0	Not able to read and write	Unemployed	0	0	0	1	0	0	0	0	2000		3	No								Yes	Doctors(others health personal)	1	0	1	0	No		Yes	Yes	Yes	Yes	Yes	Yes	Yes	Yes	Yes	Yes	Yes	Yes	Yes	Yes
65	Female	Married	0	1	0	0	Not able to read and write	Unemployed	0	0	1	0	1	0	0	0	2500		20	No								Yes	Doctors(others health personal)	1	1	1	0	No		Yes	Yes	Yes	Yes	Yes	Yes	Yes	Yes	Yes	Yes	Yes	Yes	Yes	Yes
70	Male	Married	0	1	0	0	Primary education /1-8/	Other Specify	0	0	1	0	1	0	0	0	3500		15	No								Yes	Doctors(others health personal)	1	1	1	0	No		Yes	Yes	Yes	Yes	No	No	No	Yes	Yes	Yes	Yes	Yes	Yes	Yes
85	Male	Divorced	0	1	0	0	Primary education /1-8/	Unemployed	0	0	0	0	1	0	0	0	1200		3	No								Yes	Doctors(others health personal)	1	0	1	0	No		Yes	Yes	Yes	Yes	Yes	Yes	Yes	Yes	Yes	Yes	Yes	Yes	Yes	Yes
50	Female	Married	0	1	0	0	Not able to read and write	Unemployed	0	0	0	1	0	0	0	0	1000		1	No								Yes	Doctors(others health personal)	1	0	1	1	No		Yes	Yes	Yes	Yes	Yes	Yes	Yes	Yes	Yes	Yes	Yes	Yes	Yes	Yes
55	Female	Married	0	1	0	0	Not able to read and write	Unemployed	0	0	0	1	0	0	0	0	7000		3	Yes	Diabetic-related heart disease	0	0	0	0	1	0	Yes	Doctors(others health personal)	1	0	0	0	No		Yes	Yes	Yes	Yes	No	Yes	Yes	Yes	Yes	Yes	No	Yes	Yes	Yes
50	Male	Divorced	0	1	0	0	Secondary education /9-12/	Other Specify	0	0	0	0	0	0	0	1	3000		3	Yes	Others(specify)	0	0	0	0	0	1	Yes	Mass media	0	1	0	0	No		Yes	Yes	No	Yes	Yes	Yes	Yes	No	Yes	No	No	Yes	No	Yes
84	Male	Married	0	1	0	0	Secondary education /9-12/	Unemployed	1	0	0	0	0	0	0	0	2500		10	Yes	Others(specify)	0	0	0	0	0	1	Yes	Doctors(others health personal)	1	0	0	0	Yes		Yes	Yes	Yes	Yes	Yes	Yes	Yes	Yes	Yes	Yes	No	No	Yes	Yes
55	Female	Married	0	1	0	0	Not able to read and write	Unemployed	0	0	0	1	0	0	0	0	200		6	Yes	Others(specify)	0	0	0	0	0	1	No	Skip					Yes		Yes	Yes	Yes	Yes	Yes	Yes	Yes	Yes	Yes	Yes	Yes	Yes	No	Yes
60	Female	Widowed	0	0	0	1	Not able to read and write	Employed	0	1	0	0	0	0	0	0	500		2	Yes	Others(specify)	0	0	0	0	0	1	No	Skip					No		Yes	No	Yes	Yes	Yes	Yes	Yes	Yes	Yes	Yes	Yes	Yes	No	Yes
46	Female	Married	0	1	0	0	Secondary education /9-12/	Unemployed	0	0	0	1	0	0	0	0	100		2	No								Yes	Doctors(others health personal)	1	1	0	0	No		Yes	Yes	Yes	Yes	Yes	No	Yes	Yes	Yes	Yes	Yes	Yes	Yes	Yes
60	Male	Married	0	1	0	0	Primary education /1-8/	Employed	0	1	0	0	0	0	0	0	800		5	Yes	Diabetic neuropathy	0	1	0	0	0	0	Yes	Mass media	0	1	0	0	No		Yes	Yes	Yes	Yes	Yes	Yes	Yes	Yes	Yes	Yes	Yes	Yes	Yes	Yes
62	Male	Divorced	0	1	0	0	Primary education /1-8/	Employed	0	1	0	0	0	0	0	0	3000		2	No	Diabetic nephropathy							No	Skip					No		No	Yes	Yes	Yes	Yes	Yes	Yes	Yes	Yes	Yes	Yes	Yes	No	Yes
75	Male	Married	0	1	0	0	Primary education /1-8/	Employed	0	1	0	0	0	0	0	0	2000		2	Yes	Diabetic nephropathy	1	0	0	0	0	0	Yes	Doctors(others health personal)	1	1	0	0	No		Yes	Yes	Yes	Yes	Yes	Yes	Yes	Yes	Yes	Yes	Yes	Yes	No	Yes
56	Male	Married	0	1	0	0	Secondary education /9-12/	Unemployed	0	0	0	0	1	0	0	0	1000		2	Yes	Others(specify)	0	0	0	0	0	1	No	Skip					No		Yes	Yes	Yes	Yes	Yes	Yes	Yes	Yes	Yes	Yes	Yes	Yes	No	No
45	Female	Divorced	0	1	0	0	Primary education /1-8/	Unemployed	0	0	0	1	0	0	0	0	10000		6	No								Yes	Doctors(others health personal)	1	0	0	0	Yes		Yes	Yes	Yes	Yes	Yes	Yes	Yes	Yes	Yes	Yes	Yes	Yes	Yes	Yes
32	Male	Married	0	1	0	0	Primary education /1-8/	Unemployed	0	0	1	0	1	0	0	0	3000		2	No								Yes	Doctors(others health personal)	1	0	1	0	No		Yes	Yes	Yes	Yes	Yes	Yes	Yes	Yes	Yes	Yes	Yes	Yes	Yes	Yes
38	Male	Married	0	1	0	0	Secondary education /9-12/	Unemployed	0	0	1	0	1	0	0	0	1000		10	No								Yes	Doctors(others health personal)	1	0	1	0	No		Yes	Yes	Yes	Yes	Yes	Yes	Yes	Yes	Yes	Yes	Yes	Yes	Yes	Yes
30	Female	Married	0	1	0	0	Not able to read and write	Unemployed	0	0	0	1	0	0	0	0	1500		6	No								Yes	Doctors(others health personal)	1	0	1	0	No		Yes	Yes	Yes	Yes	Yes	Yes	Yes	Yes	Yes	Yes	Yes	Yes	No	Yes
39	Male	Married	0	1	0	0	Above grade 12	Unemployed	0	0	0	0	0	0	0	1	10000		3	No								Yes	Doctors(others health personal)	1	0	0	0	No		Yes	No	No	No	No	Yes	Yes	No	No	No	No	Yes	No	No
61	Male	Married	0	1	0	0	Primary education /1-8/	Unemployed	0	0	0	0	1	0	0	0	12000		3	No								Yes	Doctors(others health personal)	1	0	0	0	No		Yes	No	No	No	Yes	Yes	No	No	No	No	No	Yes	No	No
70	Female	Married	0	1	0	0	Able to read and write only	Unemployed	0	0	0	1	0	0	0	0	600		6	Yes	Others(specify)	0	0	0	1	0	0	Yes	Doctors(others health personal)	1	0	0	0	No		Yes	No	No	No	No	No	No	No	No	Yes	No	Yes	Yes	No
55	Female	Married	0	1	0	0	Able to read and write only	Employed	0	1	0	0	0	0	0	0	5000		3	No								Yes	Doctors(others health personal)	1	0	0	0	No		Yes	No	Yes	No	No	No	No	No	No	No	No	No	No	No
58	Male	Married	0	1	0	0	Above grade 12	Other Specify	0	0	1	0	0	0	0	0	14000		2	No								Yes	Doctors(others health personal)	1	0	0	0	No		Yes	Yes	Yes	No	No	No	No	No	No	No	No	No	No	No
38	Female	Divorced	0	0	1	0	Not able to read and write	Other Specify	0	0	1	0	0	0	0	0	2000		2	No								No	Skip					No		Yes	No	No	No	No	No	No	No	No	No	No	No	No	No
58	Male	Divorced	0	0	1	0	Primary education /1-8/	Unemployed	0	0	0	1	0	0	0	0	2800		3	No								Yes	Doctors(others health personal)	1	0	0	0	No		No	Yes	No	No	Yes	No	No	No	No	No	No	No	No	No
40	Female	Married	0	1	0	0	Secondary education /9-12/	Employed	0	1	0	0	0	0	0	0	1850		1	No								Yes	Doctors(others health personal)	1	0	0	0	No		No	Yes	No	No	Yes	No	No	No	Yes	No	No	Yes	Yes	No
50	Female	Married	0	1	0	0	Not able to read and write	Unemployed	0	0	1	1	0	0	0	0	1500		2	No								Yes	Doctors(others health personal)	1	1	1	0	No		Yes	Yes	Yes	Yes	Yes	Yes	Yes	Yes	Yes	Yes	Yes	Yes	Yes	Yes
35	Male	Married	0	1	0	0	Primary education /1-8/	Unemployed	0	0	1	0	1	0	0	0	2000		6	No								Yes	Doctors(others health personal)	1	1	1	0	No		Yes	Yes	Yes	Yes	No	No	No	Yes	Yes	Yes	Yes	Yes	Yes	No
35	Male	Married	0	1	0	0	Primary education /1-8/	Unemployed	0	0	0	0	1	0	0	0	2000		4	Yes	Others(specify)	0	0	0	0	0	1	No	Skip					No		Yes	Yes	Yes	Yes	No	Yes	Yes	Yes	Yes	Yes	Yes	Yes	Yes	Yes
24	Male	Married	0	1	0	0	Primary education /1-8/	Unemployed	0	0	1	0	1	0	0	0	1000		8	No								Yes	Doctors(others health personal)	1	1	1	0	No		Yes	Yes	Yes	Yes	Yes	Yes	Yes	Yes	Yes	Yes	Yes	Yes	Yes	Yes
50	Female	Divorced	0	0	1	0	Primary education /1-8/	Employed	0	1	0	0	0	0	0	0	1000		12	Yes	Others(specify)	0	0	0	0	0	1	Yes	Doctors(others health personal)	1	0	0	0	Yes		Yes	Yes	Yes	Yes	Yes	Yes	Yes	Yes	Yes	Yes	Yes	Yes	No	Yes
45	Female	Married	0	1	0	0	Secondary education /9-12/	Employed	1	0	0	0	0	0	0	0	1400		13	No								No	Skip					Yes		No	Yes	Yes	Yes	Yes	Yes	Yes	Yes	Yes	Yes	Yes	Yes	Yes	Yes
79	Male	Married	0	1	0	0	Secondary education /9-12/	Employed	1	0	0	0	0	0	0	0	2000		20	Yes	Diabetic neuropathy	0	1	0	0	0	1	Yes	Mass media	0	1	0	0	No		Yes	Yes	Yes	Yes	Yes	Yes	Yes	Yes	Yes	Yes	Yes	Yes	Yes	Yes
70	Female	Widowed	0	0	0	1	Primary education /1-8/	Employed	0	1	0	0	0	0	0	0	1000		20	Yes	Diabetic nephropathy	1	0	0	0	0	1	Yes	Doctors(others health personal)	1	0	0	0	Yes		Yes	Yes	Yes	Yes	Yes	Yes	Yes	Yes	Yes	Yes	Yes	Yes	Yes	Yes
50	Male	Married	0	1	0	0	Primary education /1-8/	Employed	0	1	0	0	0	0	0	0	500		10	No								Yes	Doctors(others health personal)	1	0	0	0	Yes		Yes	Yes	Yes	Yes	Yes	Yes	Yes	Yes	Yes	Yes	Yes	Yes	Yes	Yes
50	Male	Married	0	1	0	0	Secondary education /9-12/	Employed	0	1	0	0	0	0	0	0	30000		3	No								Yes	Mass media	0	1	0	0	No		No	Yes	Yes	Yes	Yes	Yes	Yes	Yes	Yes	Yes	Yes	Yes	No	Yes
47	Male	Married	0	1	0	0	Primary education /1-8/	Unemployed	0	0	0	0	1	0	0	0	5000		5	No								No	Skip					No		Yes	Yes	Yes	Yes	Yes	Yes	Yes	Yes	Yes	Yes	Yes	Yes	Yes	Yes
66	Male	Married	0	1	0	0	Primary education /1-8/	Employed	0	1	0	0	0	0	0	0	500		12	Yes	Others(specify)	0	0	0	0	0	1	Yes	Doctors(others health personal)	1	0	0	0	Yes		Yes	Yes	Yes	Yes	Yes	Yes	Yes	Yes	Yes	Yes	Yes	Yes	Yes	Yes
83	Male	Married	0	1	0	0	Primary education /1-8/	Employed	1	0	0	0	0	0	0	0	2000		3	Yes	Diabetic retinopathy	0	0	1	0	0	0	No	Skip					Yes		Yes	Yes	Yes	Yes	Yes	Yes	Yes	Yes	Yes	Yes	Yes	Yes	Yes	Yes
73	Male	Married	0	1	0	0	Primary education /1-8/	Employed	1	0	0	0	0	0	0	0	9000		7	Yes	Diabetic retinopathy	0	0	1	0	0	0	Yes	Others(specify)	0	0	0	1	Yes		No	Yes	Yes	Yes	Yes	Yes	Yes	Yes	Yes	Yes	Yes	Yes	Yes	Yes
65	Male	Married	0	1	0	0	Not able to read and write	Unemployed	0	0	0	0	1	0	0	0	1000		2	No								No	Skip					No		Yes	Yes	Yes	Yes	Yes	Yes	Yes	Yes	Yes	Yes	Yes	Yes	Yes	Yes
65	Male	Married	0	1	0	0	Above grade 12	Employed	0	1	0	0	0	0	0	0	20000		35	No	Others(specify)	1	0	0	0	0	1	Yes	Mass media	1	1	0	1	Yes		Yes	Yes	Yes	Yes	Yes	Yes	Yes	Yes	Yes	Yes	Yes	Yes	Yes	Yes
47	Male	Married	0	1	0	0	Primary education /1-8/	Unemployed	0	0	0	0	1	0	0	0	10000		1	No								Yes	Doctors(others health personal)	1	0	0	0	No		Yes	Yes	Yes	Yes	No	Yes	Yes	Yes	Yes	Yes	Yes	Yes	Yes	Yes
40	Male	Married	0	1	0	0	Primary education /1-8/	Unemployed	0	0	0	0	1	0	0	0	2000		7	No								Yes	Mass media	1	0	1	0	No		Yes	Yes	Yes	Yes	Yes	Yes	Yes	Yes	Yes	Yes	Yes	Yes	Yes	Yes
70	Female	Married	0	1	0	0	Not able to read and write	Unemployed	0	0	0	1	0	0	0	0	1500		18	No								Yes	Friends or family	1	0	1	0	No		Yes	Yes	Yes	Yes	No	No	Yes	Yes	Yes	Yes	Yes	Yes	Yes	Yes
52	Female	Married	0	1	0	0	Secondary education /9-12/	Unemployed	0	0	1	1	0	0	0	0	3000		1	No								Yes	Doctors(others health personal)	1	1	1	0	No		Yes	Yes	Yes	Yes	Yes	Yes	Yes	Yes	Yes	Yes	Yes	Yes	Yes	Yes
80	Male	Married	0	1	0	0	Primary education /1-8/	Employed	1	0	0	0	0	0	0	0	500		35	Yes	Others(specify)	0	0	0	0	0	1	No	Skip					No		Yes	Yes	Yes	Yes	Yes	Yes	Yes	Yes	Yes	Yes	Yes	Yes	Yes	Yes
48	Male	Married	0	1	0	0	Primary education /1-8/	Unemployed	0	0	0	0	1	0	0	0	2000		3	No								Yes	Doctors(others health personal)	1	1	0	0	No		Yes	No	No	No	No	No	No	No	No	No	No	Yes	No	No
60	Female	Married	0	1	0	0	Able to read and write only	Unemployed	0	0	0	1	0	0	0	0	0		4	No								Yes	Doctors(others health personal)	1	1	0	0	No		No	No	No	No	No	No	No	No	No	No	No	No	No	No
48	Female	Married	0	1	0	0	Primary education /1-8/	Unemployed	0	0	0	1	0	0	0	0	10000		7	Yes	Others(specify)	0	0	0	0	0	1	Yes	Friends or family	1	0	1	0	No		Yes	Yes	Yes	Yes	Yes	Yes	Yes	Yes	Yes	Yes	Yes	Yes	Yes	Yes
19	Female	Single	1	0	0	0	Secondary education /9-12/	Unemployed	0	0	0	0	0	1	0	0	2000		6	No								Yes	Doctors(others health personal)	1	0	0	0	Yes		Yes	Yes	Yes	Yes	Yes	Yes	Yes	Yes	Yes	Yes	Yes	Yes	Yes	Yes
54	Male	Married	0	1	0	0	Primary education /1-8/	Unemployed	0	0	0	0	1	0	0	0	1000		17	Yes	Diabetic nephropathy	1	0	0	0	0	0	Yes	Doctors(others health personal)	1	0	0	0	Yes		Yes	Yes	Yes	Yes	Yes	Yes	Yes	Yes	Yes	Yes	Yes	Yes	Yes	Yes
85	Male	Widowed	0	0	0	1	Not able to read and write	Employed	1	0	0	0	0	0	0	0	800		7	No								No	Skip					No		Yes	No	No	No	No	No	No	No	No	No	No	No	No	No
57	Male	Married	0	1	0	0	Above grade 12	Employed	1	0	0	0	0	0	0	0	8000		13	Yes	Diabetic nephropathy	1	0	0	0	0	1	Yes	Doctors(others health personal)	1	0	0	0	No		Yes	Yes	Yes	Yes	Yes	Yes	Yes	Yes	Yes	Yes	Yes	Yes	Yes	Yes
52	Male	Married	0	1	0	0	Primary education /1-8/	Unemployed	0	0	0	0	1	0	0	0	100		8	Yes	Others(specify)	0	0	0	0	0	1	Yes	Doctors(others health personal)	1	0	0	0	Yes		Yes	Yes	Yes	Yes	Yes	Yes	Yes	Yes	Yes	Yes	Yes	Yes	Yes	Yes
76	Female	Married	0	1	0	0	Not able to read and write	Unemployed	0	0	0	0	0	1	0	0	1000		14	Yes	Others(specify)	0	0	1	0	0	1	Yes	Others(specify)	0	0	0	1	Yes		Yes	Yes	Yes	Yes	Yes	Yes	Yes	Yes	Yes	Yes	Yes	Yes	Yes	Yes
45	Male	Married	0	1	0	0	Above grade 12	Employed	1	0	0	0	0	0	0	0	4000		8	No								Yes	Doctors(others health personal)	1	0	0	0	No		Yes	Yes	Yes	Yes	Yes	Yes	Yes	Yes	Yes	Yes	Yes	Yes	Yes	Yes
55	Female	Married	0	1	0	0	Not able to read and write	Unemployed	0	0	0	0	1	0	0	0	500		2	No								Yes	Doctors(others health personal)	1	0	0	0	No		Yes	Yes	Yes	Yes	Yes	Yes	Yes	Yes	Yes	Yes	No	Yes	Yes	Yes
56	Male	Married	0	1	0	0	Primary education /1-8/	Employed	0	1	0	0	0	0	0	0	1000		4	No								Yes	Doctors(others health personal)	1	0	0	0	No		Yes	Yes	Yes	Yes	Yes	Yes	Yes	Yes	Yes	Yes	Yes	Yes	No	No
60	Male	Married	0	1	0	0	Secondary education /9-12/	Employed	1	0	0	0	0	0	0	0	1800		2	Yes	Others(specify)	0	0	0	0	0	1	No	Skip					Yes		Yes	Yes	Yes	Yes	Yes	Yes	Yes	Yes	Yes	Yes	Yes	Yes	Yes	Yes
60	Male	Married	0	1	0	0	Above grade 12	Unemployed	0	0	0	0	0	0	0	1	9000		3	No								Yes	Mass media	0	1	0	0	No		Yes	Yes	Yes	Yes	Yes	Yes	Yes	Yes	Yes	Yes	No	Yes	No	Yes
58	Female	Married	0	1	0	0	Above grade 12	Employed	1	0	0	0	0	0	0	0	12000		8	Yes	Diabetic neuropathy	0	1	0	0	0	0	Yes	Doctors(others health personal)	1	0	0	0	No		Yes	Yes	Yes	Yes	Yes	Yes	No	Yes	Yes	Yes	Yes	Yes	Yes	Yes
50	Male	Married	0	1	0	0	Above grade 12	Unemployed	1	0	0	0	0	0	0	0	14000		5	Yes	Others(specify)	0	0	0	0	0	1	Yes	Mass media	0	1	0	0	Yes		Yes	Yes	Yes	Yes	Yes	Yes	Yes	Yes	Yes	Yes	Yes	Yes	Yes	Yes
58	Male	Married	0	1	0	0	Above grade 12	Other Specify	1	0	0	0	0	0	0	0	10000		15	Yes	Diabetic-related heart disease	0	0	0	0	1	0	Yes	Doctors(others health personal)	1	0	0	0	No		Yes	Yes	Yes	Yes	Yes	Yes	Yes	Yes	Yes	Yes	No	Yes	No	Yes
75	Female	Married	0	1	0	0	Not able to read and write	Unemployed	0	0	0	1	0	0	0	0	5000		5	Yes	Others(specify)	0	0	0	0	0	1	Yes	Doctors(others health personal)	1	0	0	0	No		Yes	Yes	Yes	Yes	Yes	Yes	Yes	Yes	Yes	Yes	No	Yes	Yes	Yes
80	Female	Divorced	0	0	1	0	Not able to read and write	Unemployed	0	0	0	1	0	0	0	0	3000		10	Yes	Diabetic-related heart disease	0	0	0	0	1	0	Yes	Doctors(others health personal)	1	0	0	0	No		No	No	Yes	Yes	No	Yes	Yes	No	Yes	Yes	No	Yes	No	Yes
36	Female	Married	0	1	0	0	Primary education /1-8/	Unemployed	0	0	0	1	0	0	0	0	2000		7	Yes	Diabetic nephropathy	1	0	0	0	0	0	Yes	Doctors(others health personal)	1	0	0	0	No		Yes	Yes	Yes	Yes	Yes	Yes	No	No	Yes	Yes	No	Yes	No	Yes
60	Male	Married	0	1	0	0	Able to read and write only	Employed	0	1	0	0	0	0	0	0	15000		4	Yes	Others(specify)	0	0	0	0	0	1	Yes	Doctors(others health personal)	1	0	0	0	No		Yes	Yes	Yes	Yes	No	Yes	Yes	No	Yes	Yes	No	Yes	No	Yes
35	Female	Married	0	1	0	0	Not able to read and write	Unemployed	0	0	0	1	0	0	0	0	4000		13	Yes	Others(specify)	0	0	0	0	0	1	Yes	Doctors(others health personal)	1	0	0	0	No		Yes	Yes	Yes	Yes	No	Yes	Yes	Yes	Yes	Yes	No	Yes	No	Yes
50	Male	Married	0	1	0	0	Primary education /1-8/	Employed	0	1	0	0	0	0	0	0	15000		4	Yes	Others(specify)	0	0	0	0	0	1	Yes	Doctors(others health personal)	1	0	0	0	Yes		Yes	Yes	Yes	Yes	Yes	Yes	Yes	Yes	Yes	Yes	Yes	Yes	Yes	Yes
48	Male	Married	0	1	0	0	Above grade 12	Other Specify	1	0	0	0	0	0	0	0	6071		1	No								Yes	Doctors(others health personal)	1	0	0	1	No		Yes	Yes	Yes	Yes	Yes	Yes	Yes	Yes	Yes	Yes	Yes	Yes	Yes	Yes
73	Male	Married	0	1	0	0	Above grade 12	Other Specify	1	0	0	0	0	0	0	0	2799		30	Yes	Diabetic-related heart disease	0	0	0	0	1	1	Yes	Doctors(others health personal)	1	1	0	0	Yes		Yes	Yes	Yes	Yes	Yes	Yes	Yes	Yes	Yes	Yes	Yes	Yes	No	Yes
82	Male	Married	0	1	0	0	Primary education /1-8/	Employed	0	1	0	0	0	0	0	0	100		15	Yes	Diabetic nephropathy	0	0	0	0	0	1	Yes	Doctors(others health personal)	1	0	0	0	No		Yes	Yes	Yes	Yes	Yes	Yes	Yes	Yes	Yes	Yes	Yes	Yes	No	No
45	Male	Married	0	1	0	0	Primary education /1-8/	Unemployed	0	0	0	0	1	0	0	0	500		1	No								No	Skip					No		Yes	Yes	Yes	Yes	Yes	Yes	Yes	Yes	Yes	Yes	Yes	Yes	Yes	Yes
71	Male	Married	0	1	0	0	Primary education /1-8/	Employed	0	1	0	0	0	0	0	0	1000		1	Yes	Diabetic nephropathy	1	0	0	0	0	1	Yes	Doctors(others health personal)	1	0	0	0	No		Yes	Yes	Yes	Yes	Yes	Yes	No	Yes	Yes	Yes	Yes	Yes	No	Yes
28	Male	Single	1	0	0	0	Primary education /1-8/	Unemployed	0	0	0	0	1	0	0	0	500		8	Yes	Diabetic retinopathy	0	0	1	0	0	0	Yes	Doctors(others health personal)	1	0	0	0	No		Yes	Yes	Yes	Yes	Yes	Yes	Yes	Yes	Yes	No	Yes	Yes	No	No
75	Male	Married	0	1	0	0	Secondary education /9-12/	Employed	0	1	0	0	0	0	0	0	5000		20	Yes	Diabetic neuropathy	0	1	1	0	0	0	Yes	Doctors(others health personal)	1	0	0	0	No		Yes	Yes	Yes	No	Yes	Yes	Yes	Yes	Yes	Yes	No	Yes	No	Yes
40	Female	Married	0	1	0	0	Not able to read and write	Unemployed	0	0	0	1	0	0	0	0	500		1	No								Yes	Doctors(others health personal)	1	0	0	0	No		Yes	Yes	No	No	No	Yes	Yes	No	Yes	Yes	No	Yes	No	Yes
30	Male	Married	0	1	0	0	Secondary education /9-12/	Employed	0	1	0	0	0	0	0	0	1000		2	Yes	Others(specify)	0	0	0	0	0	1	Yes	Doctors(others health personal)	1	0	0	0	No		Yes	Yes	Yes	No	Yes	Yes	No	No	Yes	Yes	No	Yes	Yes	No
56	Female	Married	0	1	0	0	Not able to read and write	Unemployed	0	0	0	1	0	0	0	0	500		1	No								Yes	Doctors(others health personal)	1	0	0	0	No		Yes	Yes	No	No	Yes	Yes	Yes	Yes	No	No	No	Yes	No	No
38	Female	Married	0	1	0	0	Not able to read and write	Unemployed	0	0	0	1	0	0	0	0	500		4	No								Yes	Doctors(others health personal)	1	0	0	0	No		Yes	Yes	Yes	No	Yes	Yes	Yes	Yes	Yes	Yes	No	Yes	Yes	Yes
38	Male	Married	0	1	0	0	Not able to read and write	Unemployed	0	0	0	0	1	0	0	0	1000		5	Yes	Diabetic nephropathy	1	0	0	0	0	0	Yes	Doctors(others health personal)	1	0	0	0	No		Yes	Yes	No	No	No	Yes	Yes	Yes	No	No	No	Yes	No	No
39	Male	Married	0	1	0	0	Primary education /1-8/	Unemployed	0	0	0	0	1	0	0	0	1000		7	Yes	Diabetic neuropathy	0	1	0	0	0	1	Yes	Doctors(others health personal)	1	0	0	0	No		Yes	Yes	Yes	Yes	Yes	Yes	Yes	Yes	Yes	Yes	Yes	Yes	Yes	Yes
37	Male	Married	0	1	0	0	Able to read and write only	Employed	0	1	0	0	0	0	0	0	2000		3	No								Yes	Doctors(others health personal)	1	0	0	0	No		Yes	Yes	Yes	No	Yes	Yes	Yes	Yes	Yes	Yes	No	Yes	Yes	No
85	Male	Married	0	1	0	0	Able to read and write only	Unemployed	0	0	0	1	0	0	0	0	2000		5	Yes	Diabetic nephropathy	1	0	0	1	0	0	Yes	Doctors(others health personal)	1	1	0	0	No		Yes	Yes	Yes	Yes	Yes	Yes	Yes	Yes	Yes	Yes	Yes	Yes	Yes	Yes
36	Female	Married	0	1	0	0	Not able to read and write	Unemployed	0	0	0	1	0	0	0	0	1000		6	Yes	Others(specify)	0	0	0	0	0	1	Yes	Doctors(others health personal)	1	0	0	0	No		No	Yes	Yes	Yes	Yes	Yes	Yes	Yes	Yes	Yes	No	Yes	No	Yes
60	Male	Married	0	1	0	0	Secondary education /9-12/	Other Specify	1	0	0	0	0	0	0	0	10000		7	Yes	Diabetic-related heart disease	0	0	0	0	1	0	Yes	Doctors(others health personal)	1	0	0	0	No		Yes	Yes	Yes	Yes	Yes	Yes	Yes	Yes	Yes	Yes	Yes	Yes	Yes	Yes
60	Male	Married	0	1	0	0	Not able to read and write	Unemployed	0	0	0	0	1	0	0	0	7080		7	Yes	Diabetic-related heart disease	0	0	0	1	0	0	Yes	Doctors(others health personal)	1	0	0	0	No		Yes	Yes	Yes	Yes	No	Yes	Yes	Yes	Yes	No	No	Yes	No	Yes
51	Male	Married	0	1	0	0	Not able to read and write	Unemployed	0	0	0	0	1	0	0	0	10000		4	Yes	Diabetic neuropathy	0	1	0	0	0	0	Yes	Doctors(others health personal)	1	0	0	0	No		Yes	Yes	Yes	Yes	Yes	Yes	Yes	Yes	Yes	Yes	No	Yes	No	Yes
65	Female	Married	0	1	0	0	Not able to read and write	Employed	0	1	0	0	0	0	0	0	5000		6	Yes	Diabetic-related heart disease	0	0	0	0	1	0	Yes	Doctors(others health personal)	1	0	0	0	Yes		Yes	Yes	Yes	Yes	No	No	Yes	Yes	Yes	No	Yes	No	Yes	Yes
42	Male	Married	0	1	0	0	Able to read and write only	Employed	0	1	0	0	0	0	0	0	20000		8	Yes	Others(specify)	0	0	0	0	0	1	Yes	Doctors(others health personal)	1	0	0	0	No		Yes	Yes	Yes	Yes	Yes	Yes	Yes	Yes	Yes	Yes	Yes	Yes	Yes	Yes
65	Female	Married	0	1	0	0	Not able to read and write	Unemployed	0	0	0	1	0	0	0	0	3000		6	Yes	Diabetic-related heart disease	0	0	0	0	1	0	Yes	Doctors(others health personal)	1	0	0	0	No		Yes	Yes	Yes	Yes	Yes	Yes	Yes	Yes	Yes	Yes	No	Yes	No	Yes
62	Male	Divorced	0	0	1	0	Primary education /1-8/	Employed	0	1	0	0	0	0	0	0	15000		5	Yes	Others(specify)	0	0	0	0	0	1	Yes	Doctors(others health personal)	1	0	0	0	No		Yes	Yes	Yes	Yes	Yes	Yes	Yes	Yes	Yes	Yes	No	Yes	No	Yes
45	Male	Single	0	1	0	0	Secondary education /9-12/	Other Specify	0	0	0	0	0	0	0	1	6000		9	Yes	Others(specify)	0	0	0	0	0	1	Yes	Doctors(others health personal)	1	0	0	0	Yes		Yes	Yes	Yes	Yes	Yes	Yes	Yes	Yes	Yes	Yes	Yes	Yes	Yes	Yes
45	Female	Married	0	1	0	0	Not able to read and write	Other Specify	0	0	0	0	0	0	0	1	7000		10	Yes	Others(specify)	0	0	0	0	0	1	Yes	Doctors(others health personal)	1	0	0	0	No		Yes	No	Yes	Yes	Yes	Yes	Yes	Yes	Yes	Yes	No	Yes	No	Yes
72	Male	Married	0	1	0	0	Primary education /1-8/	Employed	1	0	0	0	0	0	0	0	9180		10	Yes	Others(specify)	0	0	0	0	0	1	Yes	Doctors(others health personal)	1	0	0	0	No		Yes	Yes	Yes	Yes	Yes	Yes	Yes	Yes	Yes	Yes	Yes	Yes	No	Yes
58	Male	Married	0	1	0	0	Secondary education /9-12/	Other Specify	0	0	0	0	0	0	0	1	10000		9	Yes	Diabetic-related heart disease	0	0	0	0	1	0	Yes	Doctors(others health personal)	1	0	0	0	No		Yes	Yes	Yes	Yes	Yes	Yes	Yes	Yes	Yes	Yes	Yes	Yes	No	Yes
36	Female	Widowed	0	0	0	1	Not able to read and write	Other Specify	0	0	0	0	0	1	0	0	100		5	Yes	Diabetic-related heart disease	0	0	0	0	1	0	No	Skip					Yes		Yes	No	No	Yes	Yes	Yes	Yes	Yes	Yes	Yes	Yes	Yes	No	Yes
29	Female	Married	0	1	0	0	Primary education /1-8/	Unemployed	0	0	0	1	0	0	0	0	100		20	Yes	Others(specify)	0	0	0	0	0	1	No	Skip					No		Yes	No	Yes	Yes	Yes	Yes	Yes	Yes	Yes	Yes	Yes	Yes	Yes	Yes
65	Female	Widowed	0	0	0	1	Not able to read and write	Other Specify	0	0	0	0	0	0	0	1	100		3	Yes	Others(specify)	0	0	0	1	0	1	Yes	Doctors(others health personal)	1	0	0	0	No		Yes	Yes	No	Yes	Yes	Yes	Yes	Yes	Yes	Yes	Yes	Yes	Yes	Yes
54	Male	Married	0	1	0	0	Above grade 12	Unemployed	1	0	0	0	0	0	0	0	6000		9	Yes	Others(specify)	0	0	0	0	0	1	Yes	Doctors(others health personal)	1	0	0	0	No		Yes	Yes	Yes	Yes	Yes	Yes	Yes	Yes	Yes	Yes	Yes	Yes	Yes	Yes
18	Male	Single	1	0	0	0	Secondary education /9-12/	Unemployed	0	0	0	0	0	0	1	0	100		1	No								Yes	Doctors(others health personal)	1	0	0	0	No		Yes	Yes	Yes	Yes	Yes	Yes	Yes	Yes	Yes	Yes	Yes	Yes	Yes	Yes
48	Female	Married	0	1	0	0	Primary education /1-8/	Employed	1	0	0	0	0	0	0	0	2200		4	Yes	Diabetic-related heart disease	0	0	0	0	1	1	Yes	Doctors(others health personal)	1	0	0	0	No		No	Yes	No	Yes	Yes	Yes	Yes	Yes	Yes	Yes	Yes	Yes	Yes	Yes
60	Female	Married	0	1	0	0	Primary education /1-8/	Unemployed	0	0	0	1	0	0	0	0	3500		4	No								Yes	Friends or family	1	1	0	0	No		Yes	Yes	Yes	Yes	Yes	Yes	Yes	Yes	Yes	Yes	Yes	Yes	Yes	Yes
58	Male	Married	0	1	0	0	Primary education /1-8/	Unemployed	0	0	0	0	1	0	0	0	1000		7	Yes	Others(specify)	0	0	0	0	0	1	Yes	Doctors(others health personal)	1	0	0	0	No		Yes	Yes	Yes	Yes	Yes	Yes	Yes	Yes	Yes	Yes	No	Yes	Yes	Yes
55	Male	Married	0	1	0	0	Primary education /1-8/	Other Specify	1	0	0	0	0	0	0	0	9700		9	No								Yes	Doctors(others health personal)	1	0	0	0	No		Yes	Yes	Yes	Yes	Yes	Yes	Yes	Yes	Yes	Yes	Yes	Yes	Yes	Yes
40	Male	Single	1	0	0	0	Secondary education /9-12/	Employed	0	1	0	0	0	0	0	0	4000		4	Yes	Others(specify)	0	0	0	0	0	1	Yes	Doctors(others health personal)	1	0	0	0	No		Yes	Yes	Yes	Yes	Yes	Yes	Yes	Yes	Yes	Yes	Yes	Yes	Yes	Yes
75	Male	Married	0	1	0	0	Able to read and write only	Unemployed	0	0	0	0	1	0	0	0	200		2	Yes	Diabetic nephropathy	1	0	0	0	0	0	No	Skip					No		No	No	Yes	No	Yes	Yes	Yes	Yes	Yes	Yes	Yes	Yes	No	No
50	Female	Married	0	1	0	0	Not able to read and write	Unemployed	0	0	0	1	0	0	0	0	1000		15	No								Yes	Doctors(others health personal)	1	0	0	0	No		No	No	Yes	Yes	Yes	Yes	Yes	Yes	Yes	Yes	Yes	Yes	No	No
66	Male	Married	0	1	0	0	Above grade 12	Employed	1	0	0	0	0	0	0	0	4000		16	Yes	Diabetic-related heart disease	0	0	0	0	1	1	Yes	Mass media	1	1	1	0	Yes		Yes	Yes	Yes	Yes	Yes	Yes	Yes	Yes	Yes	Yes	Yes	Yes	Yes	Yes
46	Male	Married	0	1	0	0	Primary education /1-8/	Other Specify	0	1	0	0	0	0	0	0	9000		1	No								Yes	Doctors(others health personal)	1	0	0	0	No		Yes	Yes	Yes	Yes	Yes	Yes	Yes	Yes	Yes	Yes	Yes	Yes	Yes	Yes
65	Female	Married	0	1	0	0	Not able to read and write	Unemployed	0	0	0	1	0	0	0	0	1000		25	No								No	Skip					No		No	No	Yes	Yes	Yes	Yes	No	Yes	Yes	Yes	Yes	Yes	No	No
55	Male	Married	0	1	0	0	Primary education /1-8/	Employed	0	1	0	0	0	0	0	0	3000		7	Yes	Others(specify)	0	1	0	0	0	1	Yes	Mass media	1	1	0	0	No		Yes	Yes	Yes	No	Yes	Yes	Yes	Yes	Yes	Yes	Yes	Yes	No	No
49	Female	Married	0	1	0	0	Able to read and write only	Unemployed	0	0	0	1	0	0	0	0	300		4	No								Yes	Doctors(others health personal)	1	0	0	0	No		Yes	No	Yes	No	No	Yes	Yes	Yes	Yes	Yes	No	Yes	No	No
47	Male	Married	0	1	0	0	Secondary education /9-12/	Other Specify	0	0	0	0	0	0	0	1	500		9	Yes	Diabetic neuropathy	0	1	0	0	0	1	Yes	Mass media	1	1	0	0	No		Yes	Yes	Yes	No	No	Yes	Yes	Yes	Yes	Yes	No	Yes	No	Yes
60	Female	Married	0	1	0	0	Secondary education /9-12/	Unemployed	1	0	0	0	0	0	0	0	5000		12	Yes	Diabetic-related heart disease	0	0	0	0	1	1	Yes	Mass media	1	1	0	0	Yes		Yes	Yes	Yes	Yes	Yes	Yes	Yes	Yes	Yes	Yes	Yes	Yes	Yes	Yes
72	Male	Married	0	1	0	0	Above grade 12	Other Specify	1	0	0	0	0	0	0	0	6000		33	Yes	Others(specify)	0	0	0	0	0	1	Yes	Mass media	0	1	1	0	No		Yes	Yes	Yes	Yes	Yes	Yes	Yes	Yes	Yes	Yes	Yes	Yes	Yes	No
50	Female	Widowed	0	0	0	1	Not able to read and write	Unemployed	0	0	0	0	1	0	0	0	1000		3	No								No	Skip					Yes		Yes	No	Yes	Yes	No	Yes	No	Yes	Yes	Yes	Yes	Yes	No	Yes
72	Male	Married	0	1	0	0	Secondary education /9-12/	Employed	1	0	0	0	0	0	0	0	4000		8	Yes	Diabetic nephropathy	1	0	0	0	0	1	Yes	Mass media	1	1	0	0	Yes		Yes	Yes	Yes	Yes	Yes	Yes	Yes	Yes	Yes	Yes	Yes	Yes	Yes	Yes
50	Female	Married	0	1	0	0	Secondary education /9-12/	Employed	0	1	0	0	0	0	0	0	9500		6	Yes	Others(specify)	0	0	0	0	0	1	Yes	Mass media	0	1	0	0	No		Yes	Yes	Yes	Yes	Yes	Yes	Yes	Yes	Yes	Yes	Yes	Yes	Yes	Yes
50	Male	Single	1	0	0	0	Secondary education /9-12/	Other Specify	0	0	0	0	0	0	0	1	100		8	Yes	Others(specify)	0	0	0	0	0	1	No	Skip					No		Yes	Yes	Yes	Yes	Yes	Yes	Yes	Yes	Yes	Yes	Yes	Yes	Yes	Yes
48	Female	Married	0	1	0	0	Secondary education /9-12/	Unemployed	0	0	0	1	0	0	0	0	3800		6	No								Yes	Doctors(others health personal)	1	1	0	0	Yes		Yes	Yes	Yes	Yes	Yes	Yes	Yes	Yes	Yes	Yes	Yes	Yes	Yes	Yes
55	Female	Married	0	1	0	0	Secondary education /9-12/	Employed	0	1	0	0	0	0	0	0	2000		1	No								Yes	Mass media	1	1	0	0	No		Yes	Yes	Yes	Yes	Yes	Yes	Yes	Yes	Yes	Yes	Yes	Yes	Yes	Yes
40	Female	Married	0	1	0	0	Not able to read and write	Unemployed	0	0	0	1	0	0	0	0	500		7	Yes	Diabetic neuropathy	0	1	0	0	0	1	Yes	Doctors(others health personal)	1	0	0	0	No		Yes	No	No	No	Yes	Yes	Yes	No	Yes	No	No	Yes	No	Yes
72	Male	Married	0	1	0	0	Primary education /1-8/	Unemployed	0	0	0	0	1	0	0	0	2000		8	Yes	Diabetic retinopathy	0	0	1	0	0	0	Yes	Doctors(others health personal)	1	1	1	0	No		Yes	Yes	Yes	Yes	Yes	Yes	Yes	Yes	Yes	Yes	Yes	Yes	No	No
40	Female	Divorced	0	0	1	0	Not able to read and write	Unemployed	0	0	0	1	0	0	0	0	500		2	No								Yes	Doctors(others health personal)	1	0	0	0	No		Yes	Yes	Yes	No	Yes	Yes	Yes	Yes	Yes	Yes	Yes	Yes	No	Yes
55	Male	Married	0	1	0	0	Primary education /1-8/	Employed	0	1	0	0	0	0	0	0	1000		2	Yes	Others(specify)	0	0	0	0	0	1	Yes	Doctors(others health personal)	1	1	0	0	No		Yes	Yes	Yes	No	No	Yes	Yes	Yes	Yes	Yes	Yes	Yes	Yes	Yes
32	Male	Single	1	0	0	0	Above grade 12	Other Specify	1	0	0	0	0	0	0	0	5000		3	No								Yes	Doctors(others health personal)	1	1	1	0	No		Yes	Yes	Yes	Yes	Yes	Yes	Yes	Yes	Yes	Yes	Yes	Yes	Yes	Yes
58	Female	Married	0	1	0	0	Able to read and write only	Unemployed	0	0	0	1	0	0	0	0	7000		13	Yes	Others(specify)	0	0	0	0	0	1	Yes	Doctors(others health personal)	1	0	0	0	No		Yes	Yes	Yes	Yes	Yes	Yes	Yes	Yes	Yes	Yes	No	Yes	Yes	Yes
40	Female	Married	0	1	0	0	Able to read and write only	Unemployed	0	0	0	1	0	0	0	0	10000		4	Yes	Others(specify)	0	0	0	0	0	1	Yes	Doctors(others health personal)	1	0	0	0	Yes		Yes	Yes	Yes	Yes	Yes	Yes	Yes	Yes	Yes	Yes	Yes	Yes	No	Yes
65	Female	Married	0	1	0	0	Not able to read and write	Unemployed	0	0	0	1	0	0	0	0	6000		9	Yes	Diabetic-related heart disease	0	0	0	0	1	0	Yes	Doctors(others health personal)	1	0	0	0	No		Yes	Yes	Yes	Yes	Yes	Yes	Yes	Yes	Yes	Yes	Yes	Yes	No	Yes
45	Female	Married	0	1	0	0	Primary education /1-8/	Unemployed	0	0	0	1	0	0	0	0	6000		5	Yes	Others(specify)	0	0	0	0	0	1	Yes	Doctors(others health personal)	1	0	0	0	No		Yes	Yes	Yes	Yes	Yes	Yes	Yes	Yes	Yes	Yes	Yes	Yes	Yes	Yes
77	Female	Married	0	1	0	0	Primary education /1-8/	Unemployed	0	0	0	1	0	0	0	0	7000		4	Yes	Diabetic-related heart disease	0	0	0	0	1	0	Yes	Doctors(others health personal)	1	0	0	0	No		Yes	Yes	Yes	Yes	Yes	Yes	Yes	Yes	Yes	Yes	Yes	Yes	Yes	Yes
65	Male	Married	0	1	0	0	Primary education /1-8/	Unemployed	0	0	0	0	1	0	0	0	16000		8	Yes	Others(specify)	0	0	0	0	0	1	Yes	Doctors(others health personal)	1	0	0	0	No		Yes	Yes	Yes	Yes	Yes	Yes	Yes	Yes	Yes	Yes	Yes	Yes	Yes	Yes
65	Female	Married	0	1	0	0	Secondary education /9-12/	Unemployed	0	0	0	1	0	0	0	0	8000		5	Yes	Others(specify)	0	0	0	0	0	1	Yes	Doctors(others health personal)	1	0	0	0	No		Yes	Yes	Yes	Yes	Yes	Yes	Yes	Yes	Yes	Yes	No	Yes	No	Yes
42	Male	Married	0	1	0	0	Secondary education /9-12/	Employed	0	1	0	0	0	0	0	0	15000		5	Yes	Others(specify)	0	0	0	0	0	1	Yes	Doctors(others health personal)	1	0	0	0	No		Yes	Yes	Yes	Yes	Yes	Yes	Yes	Yes	Yes	Yes	No	Yes	No	Yes
36	Male	Married	0	1	0	0	Secondary education /9-12/	Other Specify	0	0	1	0	0	0	0	0	5000		7	No								Yes	Mass media	1	1	1	0	No		Yes	Yes	Yes	Yes	Yes	Yes	Yes	Yes	Yes	Yes	No	Yes	No	Yes
52	Male	Married	0	1	0	0	Secondary education /9-12/	Employed	1	0	0	0	0	0	0	0	6000		9	Yes	Others(specify)	0	1	0	0	0	1	Yes	Mass media	1	1	0	0	No		Yes	Yes	Yes	No	Yes	Yes	Yes	Yes	Yes	Yes	Yes	Yes	No	Yes
42	Female	Married	0	1	0	0	Secondary education /9-12/	Employed	1	0	0	0	0	0	0	0	3000		7	Yes	Diabetic foot ulcer	1	0	0	1	0	0	Yes	Mass media	1	1	1	0	No		Yes	Yes	Yes	No	Yes	Yes	Yes	No	Yes	Yes	Yes	Yes	No	Yes
43	Male	Married	0	1	0	0	Not able to read and write	Unemployed	0	0	0	0	1	0	0	0	2000		3	No								Yes	Doctors(others health personal)	1	0	0	0	No		Yes	Yes	No	No	No	Yes	Yes	Yes	No	Yes	No	Yes	No	No
60	Male	Married	0	1	0	0	Primary education /1-8/	Employed	0	1	0	0	0	0	0	0	500		2	Yes	Others(specify)	1	0	0	0	0	1	Yes	Doctors(others health personal)	1	0	0	0	Yes		Yes	Yes	Yes	Yes	Yes	Yes	Yes	Yes	Yes	Yes	Yes	Yes	Yes	Yes
54	Female	Married	0	1	0	0	Able to read and write only	Unemployed	0	0	0	1	0	0	0	0	1000		7	Yes	Others(specify)	0	0	0	0	0	1	Yes	Doctors(others health personal)	1	0	0	0	No		Yes	No	Yes	Yes	Yes	Yes	Yes	Yes	Yes	Yes	Yes	Yes	No	Yes
48	Female	Married	0	1	0	0	Primary education /1-8/	Employed	0	1	0	0	0	0	0	0	500		5	Yes	Others(specify)	0	0	0	0	0	1	Yes	Doctors(others health personal)	1	0	0	0	No		Yes	Yes	Yes	Yes	Yes	Yes	No	No	Yes	Yes	Yes	Yes	No	Yes
42	Male	Married	0	1	0	0	Above grade 12	Employed	1	0	0	0	0	0	0	0	10000		4	No								Yes	Mass media	0	1	0	0	No		Yes	Yes	Yes	Yes	Yes	Yes	Yes	Yes	Yes	Yes	Yes	Yes	Yes	Yes
70	Female	Widowed	0	0	0	1	Not able to read and write	Employed	0	1	0	0	0	0	0	0	1000		1	No								Yes	Friends or family	0	0	1	0	No		Yes	Yes	Yes	Yes	Yes	Yes	No	Yes	Yes	Yes	Yes	Yes	No	Yes
40	Male	Married	0	1	0	0	Primary education /1-8/	Employed	0	1	0	0	0	0	0	0	1000		5	No								Yes	Doctors(others health personal)	1	1	0	0	Yes		Yes	Yes	Yes	Yes	Yes	Yes	Yes	Yes	Yes	Yes	Yes	Yes	Yes	Yes
63	Male	Married	0	1	0	0	Not able to read and write	Employed	1	0	0	0	0	0	0	0	4000		5	Yes	Others(specify)	0	0	0	0	0	1	Yes	Doctors(others health personal)	1	0	0	0	No		Yes	Yes	Yes	Yes	Yes	Yes	Yes	Yes	Yes	Yes	Yes	Yes	Yes	Yes
65	Female	Married	0	1	0	0	Not able to read and write	Unemployed	0	0	0	1	0	0	0	0	8000		15	Yes	Others(specify)	0	0	0	0	0	1	Yes	Doctors(others health personal)	1	0	0	0	No		Yes	Yes	Yes	Yes	Yes	Yes	Yes	No	Yes	Yes	Yes	Yes	Yes	Yes
65	Male	Married	0	1	0	0	Able to read and write only	Unemployed	0	0	0	0	1	0	0	0	10000		13	Yes	Diabetic-related heart disease	0	0	0	0	1	0	Yes	Doctors(others health personal)	1	0	0	0	No		Yes	Yes	Yes	Yes	Yes	Yes	Yes	Yes	Yes	Yes	No	Yes	Yes	Yes
37	Male	Married	0	1	0	0	Secondary education /9-12/	Other Specify	0	0	0	0	0	0	0	1	7000		5	Yes	Diabetic foot ulcer	1	0	0	0	0	0	Yes	Doctors(others health personal)	1	0	0	0	No		Yes	Yes	Yes	Yes	Yes	Yes	Yes	Yes	Yes	Yes	No	Yes	Yes	Yes
76	Male	Married	0	1	0	0	Able to read and write only	Unemployed	0	0	0	0	1	0	0	0	15000		10	Yes	Diabetic-related heart disease	0	0	0	0	1	0	Yes	Doctors(others health personal)	1	0	0	0	No		Yes	Yes	Yes	Yes	Yes	Yes	Yes	Yes	Yes	Yes	No	Yes	Yes	Yes
36	Male	Married	0	1	0	0	Primary education /1-8/	Employed	0	1	0	0	0	0	0	0	10000		5	Yes	Others(specify)	0	0	0	0	0	1	Yes	Mass media	0	1	0	0	No		Yes	Yes	Yes	Yes	Yes	Yes	Yes	Yes	Yes	Yes	No	Yes	Yes	Yes
57	Male	Married	0	1	0	0	Primary education /1-8/	Unemployed	0	0	0	0	1	0	0	0	10000		7	Yes	Others(specify)	0	0	0	0	0	1	Yes	Friends or family	1	0	0	0	No		Yes	Yes	Yes	Yes	Yes	Yes	Yes	Yes	Yes	Yes	Yes	Yes	Yes	Yes
52	Male	Married	0	1	0	0	Primary education /1-8/	Employed	1	0	0	0	0	0	0	0	8000		6	Yes	Others(specify)	0	0	0	0	0	1	Yes	Doctors(others health personal)	1	0	0	0	No		Yes	Yes	Yes	Yes	Yes	Yes	Yes	Yes	Yes	Yes	No	Yes	Yes	Yes
45	Male	Married	0	1	0	0	Able to read and write only	Unemployed	0	0	0	0	1	0	0	0	10000		3	Yes	Others(specify)	0	0	0	0	0	1	Yes	Doctors(others health personal)	1	0	0	0	No		Yes	Yes	Yes	Yes	Yes	Yes	Yes	Yes	Yes	Yes	No	Yes	Yes	Yes
40	Female	Married	0	1	0	0	Primary education /1-8/	Employed	0	1	0	0	0	0	0	0	200		1	Yes	Others(specify)	0	0	0	0	0	1	Yes	Doctors(others health personal)	1	0	0	0	No		No	No	Yes	Yes	Yes	Yes	Yes	Yes	Yes	Yes	Yes	Yes	No	Yes
83	Male	Married	0	1	0	0	Not able to read and write	Employed	0	1	0	0	0	0	0	0	500		27	Yes	Diabetic nephropathy	1	1	1	0	0	1	No	Skip					No		Yes	No	Yes	Yes	Yes	Yes	Yes	Yes	Yes	Yes	Yes	Yes	Yes	Yes
38	Male	Married	0	1	0	0	Not able to read and write	Employed	0	1	0	0	0	0	0	0	6000		6	No								Yes	Doctors(others health personal)	1	0	0	0	No		Yes	Yes	Yes	Yes	Yes	Yes	Yes	Yes	Yes	Yes	Yes	Yes	Yes	Yes
41	Male	Married	0	1	0	0	Not able to read and write	Employed	0	1	0	0	0	0	0	0	3000		10	Yes	Diabetic retinopathy	0	0	1	0	0	0	Yes	Doctors(others health personal)	1	1	0	0	No		Yes	Yes	Yes	Yes	Yes	Yes	Yes	Yes	Yes	Yes	Yes	Yes	Yes	Yes
57	Male	Married	0	1	0	0	Secondary education /9-12/	Employed	0	1	0	0	0	0	0	0	4057		34	Yes	Others(specify)	0	0	0	0	0	1	Yes	Doctors(others health personal)	1	0	0	0	Yes		Yes	Yes	Yes	Yes	Yes	Yes	Yes	Yes	Yes	Yes	Yes	Yes	Yes	Yes
67	Male	Married	0	1	0	0	Primary education /1-8/	Unemployed	0	0	0	0	1	0	0	0	3000		7	Yes	Others(specify)	0	0	0	0	0	1	Yes	Doctors(others health personal)	1	0	0	0	Yes		Yes	Yes	Yes	Yes	Yes	Yes	Yes	Yes	Yes	Yes	Yes	Yes	No	Yes
71	Male	Married	0	1	0	0	Above grade 12	Employed	0	1	0	0	0	0	0	0	2400		5	Yes	Others(specify)	0	0	0	0	0	1	No	Skip					No		Yes	Yes	Yes	Yes	Yes	Yes	Yes	Yes	Yes	Yes	Yes	Yes	Yes	Yes
55	Male	Married	0	1	0	0	Secondary education /9-12/	Employed	0	1	0	0	0	0	0	0	3000		1	Yes	Diabetic nephropathy	1	0	0	0	0	1	Yes	Mass media	1	1	1	0	No		Yes	Yes	No	Yes	Yes	Yes	Yes	Yes	Yes	Yes	Yes	Yes	Yes	Yes
60	Female	Married	0	1	0	0	Secondary education /9-12/	Employed	1	0	0	0	0	0	0	0	3300		4	No								Yes	Doctors(others health personal)	1	0	0	0	No		Yes	Yes	Yes	Yes	Yes	Yes	Yes	Yes	Yes	Yes	Yes	Yes	Yes	Yes
73	Male	Married	0	1	0	0	Able to read and write only	Unemployed	0	0	0	0	1	0	0	0	5000		7	No								Yes	Doctors(others health personal)	1	0	0	0	No		Yes	No	Yes	Yes	No	Yes	Yes	Yes	No	Yes	No	Yes	Yes	Yes
70	Male	Married	0	1	0	0	Primary education /1-8/	Other Specify	0	0	1	0	0	0	0	0	100000		5	No								Yes	Doctors(others health personal)	1	0	0	0	No		No	No	No	No	Yes	Yes	Yes	No	No	Yes	Yes	Yes	Yes	Yes
70	Female	Married	0	1	0	0	Able to read and write only	Unemployed	0	0	0	1	0	0	0	0	5000		20	Yes	Diabetic neuropathy	0	1	0	0	0	0	Yes	Doctors(others health personal)	1	0	0	0	No		Yes	No	No	No	Yes	Yes	Yes	No	Yes	Yes	Yes	Yes	Yes	Yes
45	Female	Divorced	0	0	1	0	Primary education /1-8/	Employed	1	0	0	0	0	0	0	0	4500		2	No								Yes	Mass media	0	1	0	0	No		Yes	Yes	Yes	Yes	Yes	Yes	Yes	Yes	Yes	Yes	Yes	Yes	Yes	Yes
82	Male	Married	0	1	0	0	Not able to read and write	Unemployed	0	0	0	0	1	0	0	0	7000		8	Yes	Diabetic foot ulcer	0	0	0	1	0	0	Yes	Doctors(others health personal)	1	0	0	0	No		Yes	Yes	Yes	Yes	Yes	Yes	No	Yes	Yes	Yes	No	Yes	Yes	No
63	Male	Widowed	0	0	0	1	Not able to read and write	Unemployed	0	0	0	0	1	0	0	0	6500		12	No								Yes	Friends or family	0	0	1	0	No		No	Yes	No	Yes	Yes	Yes	No	No	Yes	Yes	Yes	Yes	Yes	Yes
57	Male	Married	0	1	0	0	Above grade 12	Employed	1	0	0	0	0	0	0	0	8000		10	No								Yes	Doctors(others health personal)	1	0	0	0	No		Yes	Yes	No	No	No	Yes	Yes	Yes	Yes	Yes	Yes	Yes	No	Yes
55	Female	Married	0	1	0	0	Able to read and write only	Unemployed	0	0	0	0	1	0	0	0	4500		7	No								No	Skip					No		Yes	Yes	Yes	Yes	Yes	Yes	Yes	Yes	Yes	Yes	Yes	Yes	Yes	Yes
58	Female	Married	0	1	0	0	Not able to read and write	Unemployed	0	0	0	1	0	0	0	0	4500		12	No								Yes	Doctors(others health personal)	1	0	0	0	No		Yes	No	Yes	Yes	Yes	Yes	No	Yes	No	Yes	No	Yes	Yes	No
40	Female	Married	0	1	0	0	Able to read and write only	Unemployed	0	0	0	1	0	0	0	0	8000		10	Yes	Diabetic-related heart disease	0	0	0	0	1	0	Yes	Doctors(others health personal)	1	0	0	0	No		Yes	Yes	Yes	Yes	Yes	Yes	Yes	Yes	Yes	Yes	No	Yes	Yes	Yes
65	Male	Married	0	1	0	0	Able to read and write only	Unemployed	0	0	0	0	1	0	0	0	10000		8	Yes	Others(specify)	0	0	0	0	0	1	Yes	Doctors(others health personal)	1	0	0	0	No		Yes	Yes	Yes	Yes	Yes	Yes	Yes	Yes	Yes	Yes	No	Yes	Yes	Yes
75	Female	Married	0	1	0	0	Able to read and write only	Unemployed	0	0	0	1	0	0	0	0	10000		7	Yes	Diabetic nephropathy	1	0	0	0	0	0	Yes	Doctors(others health personal)	1	0	0	0	No		Yes	Yes	Yes	Yes	Yes	Yes	Yes	Yes	Yes	Yes	No	Yes	Yes	Yes
73	Male	Married	0	1	0	0	Able to read and write only	Other Specify	0	0	1	0	0	0	0	0	15000		8	Yes	Others(specify)	0	0	0	0	0	1	Yes	Doctors(others health personal)	1	0	0	0	No		Yes	Yes	Yes	Yes	Yes	Yes	Yes	Yes	Yes	Yes	No	Yes	Yes	Yes
53	Female	Married	0	1	0	0	Primary education /1-8/	Unemployed	0	0	0	0	1	0	0	0	7000		12	No								Yes	Mass media	1	1	0	0	No		Yes	Yes	Yes	No	No	Yes	Yes	No	No	Yes	No	Yes	No	No
40	Male	Married	0	1	0	0	Able to read and write only	Other Specify	0	0	1	0	0	0	0	0	4000		4	No								Yes	Friends or family	1	1	1	0	No		Yes	No	Yes	No	Yes	Yes	Yes	Yes	Yes	Yes	No	Yes	Yes	Yes
66	Male	Married	0	1	0	0	Able to read and write only	Unemployed	0	0	0	0	1	0	0	0	8000		9	No								Yes	Doctors(others health personal)	1	0	0	0	No		Yes	No	No	Yes	Yes	Yes	Yes	Yes	Yes	Yes	Yes	Yes	Yes	Yes
50	Female	Married	0	1	0	0	Secondary education /9-12/	Unemployed	0	0	0	1	0	0	0	0	5000		7	No								No	Skip					No		Yes	Yes	Yes	Yes	Yes	Yes	Yes	Yes	Yes	Yes	Yes	Yes	No	Yes
63	Female	Widowed	0	0	0	1	Not able to read and write	Unemployed	0	0	0	1	0	0	0	0	3000		15	No								No	Skip					No		No	No	No	No	No	Yes	No	No	No	No	No	Yes	No	No
45	Male	Married	0	1	0	0	Above grade 12	Employed	1	0	0	0	0	0	0	0	6000		3	No								Yes	Doctors(others health personal)	1	1	1	0	No		Yes	Yes	Yes	Yes	Yes	Yes	Yes	Yes	Yes	Yes	Yes	Yes	Yes	Yes
40	Female	Married	0	1	0	0	Able to read and write only	Unemployed	0	0	0	1	0	0	0	0	4000		8	No								Yes	Doctors(others health personal)	1	0	0	0	No		Yes	Yes	Yes	No	Yes	Yes	Yes	Yes	Yes	No	Yes	Yes	No	No
65	Male	Married	0	1	0	0	Able to read and write only	Other Specify	0	0	1	0	0	0	0	0	8000		7	No								Yes	Doctors(others health personal)	1	0	0	0	No		Yes	Yes	Yes	Yes	Yes	Yes	Yes	Yes	No	No	No	No	Yes	No
50	Female	Married	0	1	0	0	Able to read and write only	Unemployed	0	0	0	1	0	0	0	0	3500		10	No								Yes	Doctors(others health personal)	1	1	1	0	No		No	No	No	No	No	No	Yes	Yes	Yes	No	Yes	No	No	No
70	Male	Married	0	1	0	0	Primary education /1-8/	Unemployed	0	0	0	0	1	0	0	0	10000		1	No								Yes	Doctors(others health personal)	1	0	0	0	No		Yes	Yes	Yes	Yes	Yes	Yes	Yes	Yes	Yes	Yes	Yes	Yes	Yes	Yes
64	Male	Married	0	1	0	0	Primary education /1-8/	Unemployed	0	0	0	0	1	0	0	0	3000		10	No								Yes	Doctors(others health personal)	1	0	0	0	No		Yes	No	Yes	Yes	Yes	No	No	Yes	No	Yes	No	Yes	Yes	Yes
67	Female	Divorced	0	0	1	0	Primary education /1-8/	Unemployed	0	0	0	1	0	0	0	0	3000		15	Yes	Diabetic retinopathy	0	0	1	0	0	0	Yes	Doctors(others health personal)	1	0	0	0	No		Yes	Yes	Yes	Yes	Yes	Yes	Yes	Yes	Yes	Yes	No	Yes	Yes	No
45	Male	Married	0	1	0	0	Above grade 12	Employed	1	0	0	0	0	0	0	0	5200		3	No								Yes	Doctors(others health personal)	1	1	1	0	No		Yes	Yes	Yes	Yes	Yes	Yes	Yes	Yes	Yes	Yes	Yes	Yes	Yes	Yes
45	Female	Married	0	1	0	0	Above grade 12	Employed	1	0	0	0	0	0	0	0	1000		4	Yes	Others(specify)	0	0	0	0	0	1	Yes	Doctors(others health personal)	1	1	0	0	Yes		Yes	Yes	Yes	Yes	Yes	Yes	Yes	Yes	Yes	Yes	Yes	Yes	Yes	Yes
63	Male	Married	0	1	0	0	Not able to read and write	Unemployed	0	0	0	0	1	0	0	0	200		2	No								Yes	Doctors(others health personal)	1	0	0	0	Yes		Yes	Yes	No	Yes	No	No	Yes	Yes	Yes	Yes	Yes	Yes	No	Yes
68	Male	Married	0	1	0	0	Above grade 12	Employed	1	0	0	0	0	0	0	0	4000		8	Yes	Others(specify)	0	0	0	0	0	1	Yes	Others(specify)	0	0	0	1	Yes		Yes	Yes	Yes	Yes	Yes	No	Yes	Yes	Yes	Yes	Yes	Yes	No	Yes
60	Female	Married	0	1	0	0	Not able to read and write	Unemployed	0	0	0	1	0	0	0	0	500		3	Yes	Others(specify)	0	0	0	0	0	1	Yes	Doctors(others health personal)	1	0	0	0	No		Yes	Yes	Yes	Yes	Yes	Yes	Yes	Yes	Yes	Yes	Yes	Yes	No	Yes
40	Male	Married	0	1	0	0	Secondary education /9-12/	Employed	1	0	0	0	0	0	0	0	4500		1	No								Yes	Mass media	1	1	0	0	No		Yes	Yes	Yes	Yes	Yes	Yes	Yes	Yes	Yes	Yes	Yes	Yes	Yes	Yes
53	Male	Married	0	1	0	0	Able to read and write only	Employed	0	1	0	0	0	0	0	0	500		3	No								Yes	Doctors(others health personal)	1	0	0	0	No		Yes	No	No	Yes	Yes	Yes	Yes	Yes	Yes	Yes	Yes	Yes	No	Yes
70	Female	Married	0	1	0	0	Not able to read and write	Unemployed	0	0	0	0	1	0	0	0	800		20	Yes	Diabetic nephropathy	1	0	0	0	0	0	No	Skip					No		Yes	Yes	Yes	Yes	Yes	Yes	Yes	Yes	Yes	Yes	Yes	Yes	No	Yes
60	Male	Married	0	1	0	0	Above grade 12	Employed	1	0	0	0	0	0	0	0	8000		2	Yes	Others(specify)	0	0	0	0	0	1	Yes	Mass media	0	1	0	0	No		Yes	Yes	Yes	Yes	Yes	Yes	Yes	Yes	Yes	Yes	Yes	Yes	Yes	Yes
69	Female	Widowed	0	0	0	1	Above grade 12	Employed	1	0	0	0	0	0	0	0	6000		20	Yes	Others(specify)	0	0	0	0	1	1	Yes	Doctors(others health personal)	1	0	0	1	Yes		Yes	Yes	Yes	Yes	Yes	Yes	Yes	Yes	Yes	Yes	Yes	Yes	Yes	Yes
46	Male	Married	0	1	0	0	Able to read and write only	Employed	0	1	0	0	0	0	0	0	6000		13	Yes	Others(specify)	1	0	0	0	0	1	Yes	Doctors(others health personal)	1	0	0	1	No		Yes	Yes	Yes	Yes	Yes	Yes	Yes	Yes	Yes	Yes	Yes	Yes	Yes	Yes
60	Female	Married	0	1	0	0	Able to read and write only	Unemployed	0	0	0	1	0	0	0	0	300		8	No								Yes	Doctors(others health personal)	1	0	0	0	No		Yes	Yes	Yes	Yes	Yes	Yes	Yes	Yes	Yes	Yes	Yes	Yes	Yes	Yes
64	Male	Married	0	1	0	0	Able to read and write only	Unemployed	0	0	0	0	1	0	0	0	9000		15	No								Yes	Doctors(others health personal)	1	0	1	0	No		Yes	Yes	Yes	Yes	No	Yes	No	Yes	No	Yes	Yes	No	Yes	Yes
50	Female	Widowed	0	0	0	1	Primary education /1-8/	Unemployed	0	0	0	0	1	0	0	0	3000		6	No								Yes	Doctors(others health personal)	1	0	0	0	No		Yes	No	No	No	Yes	No	Yes	Yes	No	Yes	Yes	Yes	Yes	No
45	Male	Married	0	1	0	0	Primary education /1-8/	Employed	1	0	0	0	0	0	0	0	3500		3	No								Yes	Doctors(others health personal)	1	0	0	0	No		No	Yes	Yes	Yes	Yes	Yes	Yes	Yes	Yes	Yes	Yes	Yes	Yes	Yes
50	Male	Married	0	1	0	0	Able to read and write only	Employed	0	1	0	0	0	0	0	0	500		6	Yes	Diabetic nephropathy	1	0	0	0	0	0	Yes	Doctors(others health personal)	1	0	0	0	Yes		Yes	Yes	Yes	Yes	Yes	Yes	Yes	Yes	Yes	Yes	Yes	Yes	Yes	Yes
60	Female	Married	0	1	0	0	Not able to read and write	Employed	0	1	0	0	0	0	0	0	5000		3	No								Yes	Doctors(others health personal)	1	0	0	0	Yes		Yes	Yes	Yes	Yes	Yes	Yes	Yes	Yes	Yes	Yes	Yes	Yes	Yes	Yes
108	Female	Widowed	0	0	0	1	Not able to read and write	Employed	0	1	0	0	0	0	0	0	2000		8	Yes	Diabetic retinopathy	0	0	1	0	0	1	Yes	Doctors(others health personal)	1	0	0	0	Yes		Yes	Yes	Yes	Yes	Yes	Yes	Yes	Yes	Yes	Yes	Yes	Yes	Yes	Yes
45	Male	Married	0	1	0	0	Above grade 12	Employed	1	0	0	0	0	0	0	0	11035		8	Yes	Diabetic neuropathy	0	0	0	0	0	1	Yes	Doctors(others health personal)	1	0	0	0	Yes		Yes	Yes	Yes	Yes	Yes	Yes	Yes	Yes	Yes	Yes	Yes	Yes	Yes	No
55	Female	Married	0	1	0	0	Not able to read and write	Employed	0	1	0	0	0	0	0	0	4		4	Yes	Diabetic-related heart disease	0	0	0	0	1	0	No	Skip					No		Yes	No	Yes	Yes	Yes	Yes	Yes	Yes	Yes	Yes	Yes	Yes	No	Yes
40	Female	Married	0	1	0	0	Secondary education /9-12/	Employed	1	0	0	0	0	0	0	0	5000		4	No								Yes	Doctors(others health personal)	1	1	0	0	No		Yes	Yes	Yes	Yes	Yes	Yes	Yes	Yes	Yes	Yes	Yes	Yes	Yes	Yes
58	Male	Married	0	1	0	0	Secondary education /9-12/	Employed	0	1	0	0	0	0	0	0	3000		2	Yes	Others(specify)	0	0	0	0	0	1	Yes	Doctors(others health personal)	1	0	1	0	No		Yes	Yes	Yes	Yes	Yes	Yes	Yes	Yes	Yes	Yes	Yes	Yes	Yes	Yes
40	Female	Married	0	1	0	0	Not able to read and write	Employed	0	1	0	0	0	0	0	0	200		4	No								Yes	Doctors(others health personal)	1	0	0	1	Yes		Yes	Yes	Yes	Yes	Yes	Yes	Yes	Yes	Yes	Yes	Yes	Yes	Yes	Yes
50	Male	Married	0	1	0	0	Primary education /1-8/	Unemployed	0	0	0	0	1	0	0	0	2000		7	No								No	Skip					No		Yes	Yes	Yes	Yes	Yes	Yes	Yes	Yes	Yes	Yes	Yes	Yes	No	Yes
29	Male	Married	0	1	0	0	Above grade 12	Employed	1	0	0	0	0	0	0	0	5700		12	No								Yes	Doctors(others health personal)	1	1	0	0	Yes		Yes	Yes	Yes	Yes	Yes	Yes	Yes	Yes	Yes	Yes	Yes	Yes	Yes	No
32	Female	Married	0	1	0	0	Able to read and write only	Unemployed	0	0	0	1	0	0	0	0	200		3	No								Yes	Mass media	1	0	0	0	No		Yes	Yes	Yes	Yes	Yes	Yes	Yes	Yes	Yes	Yes	Yes	Yes	Yes	Yes
75	Female	Widowed	0	0	0	1	Not able to read and write	Employed	0	1	0	0	0	0	0	0	200		5	Yes	Others(specify)	0	0	0	0	0	1	No	Skip					No		Yes	No	Yes	Yes	Yes	Yes	Yes	Yes	Yes	Yes	Yes	Yes	No	Yes
41	Male	Married	0	1	0	0	Above grade 12	Employed	0	1	0	0	0	0	0	0	8000		5	No								Yes	Mass media	1	1	1	0	No		Yes	Yes	Yes	Yes	No	Yes	Yes	Yes	Yes	Yes	Yes	Yes	Yes	Yes
64	Female	Married	0	1	0	0	Able to read and write only	Unemployed	0	0	0	1	0	0	0	0	4000		12	No								Yes	Doctors(others health personal)	1	0	0	0	No		Yes	No	Yes	No	No	Yes	No	Yes	No	No	Yes	No	No	Yes
70	Male	Widowed	0	0	0	1	Able to read and write only	Unemployed	0	0	0	0	1	0	0	0	10000		15	No								Yes	Doctors(others health personal)	1	0	0	0	No		Yes	Yes	Yes	Yes	Yes	Yes	Yes	Yes	Yes	Yes	No	Yes	No	No
80	Male	Widowed	0	0	0	1	Not able to read and write	Other Specify	0	0	0	0	0	0	0	1	4500		20	No								No	Skip					No		No	Yes	Yes	Yes	No	Yes	No	No	No	No	No	Yes	No	No
62	Male	Married	0	1	0	0	Primary education /1-8/	Unemployed	0	0	0	0	1	0	0	0	7000		8	No								Yes	Mass media	1	1	0	0	No		Yes	Yes	Yes	Yes	Yes	Yes	Yes	Yes	No	Yes	Yes	Yes	Yes	Yes
62	Female	Married	0	1	0	0	Primary education /1-8/	Unemployed	0	0	0	1	0	0	0	0	3800		8	No								Yes	Doctors(others health personal)	1	0	0	0	No		Yes	Yes	Yes	Yes	No	Yes	Yes	Yes	Yes	No	No	No	No	No
50	Male	Married	0	1	0	0	Primary education /1-8/	Unemployed	0	0	0	0	1	0	0	0	12000		7	No								Yes	Mass media	1	0	1	0	No		Yes	Yes	Yes	Yes	Yes	Yes	No	No	Yes	Yes	Yes	Yes	Yes	No
65	Male	Married	0	1	0	0	Primary education /1-8/	Unemployed	0	0	0	0	1	0	0	0	5000		11	No								Yes	Doctors(others health personal)	1	0	0	0	No		No	Yes	No	Yes	No	Yes	No	Yes	Yes	Yes	No	Yes	No	No
85	Female	Widowed	0	0	0	1	Not able to read and write	Other Specify	0	0	0	0	0	0	0	1	3500		18	No								Yes	Doctors(others health personal)	1	0	0	0	No		Yes	Yes	Yes	Yes	No	Yes	No	No	No	No	No	No	No	No
51	Male	Married	0	1	0	0	Secondary education /9-12/	Unemployed	0	0	0	0	1	0	0	0	6000		5	No								Yes	Mass media	1	1	0	0	No		Yes	Yes	Yes	No	Yes	Yes	Yes	Yes	Yes	Yes	Yes	Yes	No	Yes
77	Male	Married	0	1	0	0	Primary education /1-8/	Other Specify	0	0	0	0	0	0	0	1	4000		23	No								Yes	Doctors(others health personal)	1	0	0	0	No		Yes	Yes	No	No	No	Yes	No	No	Yes	Yes	No	No	No	No
48	Female	Married	0	1	0	0	Above grade 12	Other Specify	1	0	0	0	0	0	0	0	6193		3	No								Yes	Doctors(others health personal)	1	0	0	0	No		Yes	Yes	Yes	Yes	Yes	Yes	Yes	Yes	Yes	Yes	Yes	Yes	Yes	Yes
45	Female	Divorced	0	0	1	0	Above grade 12	Other Specify	1	0	0	0	0	0	0	0	4500		1	No								Yes	Friends or family	1	1	1	0	No		Yes	Yes	Yes	Yes	Yes	Yes	Yes	Yes	Yes	Yes	Yes	Yes	Yes	Yes
50	Male	Married	0	1	0	0	Above grade 12	Other Specify	1	0	0	0	0	0	0	0	7000		9	No								Yes	Friends or family	1	1	1	0	No		Yes	Yes	Yes	Yes	Yes	Yes	Yes	Yes	Yes	Yes	Yes	Yes	Yes	Yes
45	Female	Married	0	1	0	0	Above grade 12	Other Specify	0	0	1	0	0	0	0	0	12000		2	No								Yes	Mass media	1	1	0	0	No		Yes	Yes	Yes	Yes	Yes	Yes	Yes	Yes	Yes	Yes	Yes	Yes	Yes	Yes
18	Female	Divorced	0	0	1	0	Primary education /1-8/	Other Specify	0	0	1	0	0	0	0	0	4000		1	No								Yes	Friends or family	1	0	1	0	No		No	Yes	No	Yes	Yes	Yes	Yes	No	Yes	Yes	No	Yes	No	Yes
51	Female	Married	0	1	0	0	Primary education /1-8/	Employed	0	0	0	0	0	0	0	1	4400		6	No								Yes	Doctors(others health personal)	1	0	0	0	Yes		Yes	No	Yes	Yes	No	No	No	Yes	No	Yes	Yes	Yes	No	No
65	Male	Married	0	1	0	0	Able to read and write only	Unemployed	0	0	0	0	1	0	0	0	15000		7	Yes	Others(specify)	0	0	0	0	0	1	Yes	Doctors(others health personal)	1	0	0	0	No		Yes	Yes	Yes	Yes	No	Yes	Yes	Yes	Yes	No	Yes	Yes	Yes	Yes
55	Female	Married	0	1	0	0	Able to read and write only	Employed	0	0	0	1	0	0	0	0	5000		6	Yes	Diabetic-related heart disease	0	0	0	0	1	0	Yes	Doctors(others health personal)	1	0	0	0	No		Yes	Yes	Yes	Yes	No	Yes	Yes	Yes	Yes	Yes	No	Yes	No	Yes
39	Female	Married	0	1	0	0	Primary education /1-8/	Employed	0	0	0	1	0	0	0	0	8000		5	No								Yes	Doctors(others health personal)	1	0	0	0	No		Yes	Yes	Yes	Yes	No	Yes	Yes	Yes	Yes	Yes	No	Yes	No	Yes
56	Male	Married	0	1	0	0	Primary education /1-8/	Unemployed	0	0	0	0	1	0	0	0	7000		5	Yes	Diabetic-related heart disease	0	0	0	0	1	0	Yes	Doctors(others health personal)	1	0	0	0	No		Yes	Yes	Yes	Yes	Yes	Yes	Yes	Yes	Yes	Yes	No	Yes	No	Yes
53	Male	Married	0	1	0	0	Primary education /1-8/	Employed	0	0	0	0	0	0	0	1	10000		8	Yes	Diabetic nephropathy	0	0	0	0	0	1	Yes	Doctors(others health personal)	1	0	0	0	No		Yes	Yes	Yes	Yes	Yes	Yes	Yes	Yes	Yes	Yes	No	Yes	No	Yes
37	Male	Married	0	1	0	0	Primary education /1-8/	Unemployed	0	0	0	1	0	0	0	0	8000		7	No								Yes	Doctors(others health personal)	1	0	0	0	No		Yes	Yes	Yes	Yes	Yes	Yes	Yes	Yes	Yes	Yes	No	Yes	Yes	Yes
65	Male	Married	0	1	0	0	Primary education /1-8/	Employed	1	0	0	0	0	0	0	0	12000		9	Yes	Others(specify)	0	0	0	0	0	1	Yes	Doctors(others health personal)	1	0	0	0	No		Yes	Yes	Yes	Yes	Yes	Yes	Yes	Yes	Yes	Yes	No	Yes	No	Yes
54	Male	Married	0	1	0	0	Above grade 12	Employed	1	0	0	0	0	0	0	0	9096		7	Yes	Others(specify)	0	0	0	0	0	1	Yes	Doctors(others health personal)	1	0	0	0	No		Yes	Yes	Yes	Yes	Yes	Yes	Yes	Yes	Yes	Yes	No	Yes	No	Yes
55	Female	Married	0	1	0	0	Primary education /1-8/	Unemployed	0	0	0	1	0	0	0	0	8000		7	Yes	Others(specify)	0	0	0	0	0	1	Yes	Doctors(others health personal)	1	0	0	0	No		Yes	Yes	Yes	Yes	Yes	Yes	Yes	Yes	Yes	Yes	No	Yes	Yes	Yes
65	Female	Married	0	1	0	0	Primary education /1-8/	Unemployed	0	0	0	1	0	0	0	0	7000		8	Yes	Others(specify)	0	0	0	0	0	1	Yes	Doctors(others health personal)	1	0	0	0	No		Yes	Yes	Yes	Yes	Yes	Yes	Yes	Yes	Yes	Yes	No	Yes	Yes	Yes
50	Male	Married	0	1	0	0	Primary education /1-8/	Unemployed	0	0	0	0	1	0	0	0	10000		7	Yes	Others(specify)	0	0	0	0	0	1	Yes	Doctors(others health personal)	1	0	0	0	No		Yes	Yes	Yes	Yes	Yes	Yes	Yes	Yes	Yes	Yes	No	Yes	No	Yes
32	Male	Married	0	1	0	0	Secondary education /9-12/	Other Specify	0	0	0	0	0	0	0	1	10000		3	Yes	Others(specify)	0	0	0	0	0	1	Yes	Doctors(others health personal)	1	0	0	0	No		Yes	Yes	Yes	Yes	Yes	Yes	Yes	Yes	Yes	Yes	No	Yes	Yes	Yes
46	Male	Married	0	1	0	0	Above grade 12	Other Specify	0	0	1	0	0	0	0	0	20000		3	No								Yes	Doctors(others health personal)	1	0	0	0	No		Yes	Yes	No	No	Yes	Yes	Yes	No	Yes	Yes	No	Yes	Yes	Yes
72	Male	Married	0	1	0	0	Not able to read and write	Unemployed	0	0	0	0	1	0	0	0	5000		16	No								Yes	Doctors(others health personal)	1	0	0	0	No		Yes	Yes	Yes	Yes	No	Yes	No	No	Yes	No	No	Yes	Yes	Yes
50	Female	Widowed	0	0	0	1	Able to read and write only	Other Specify	0	0	0	0	0	0	0	1	3000		13	No								No	Skip					No		Yes	Yes	Yes	No	No	Yes	No	Yes	Yes	Yes	No	Yes	No	No
62	Male	Married	0	1	0	0	Able to read and write only	Employed	1	0	0	0	0	0	0	0	8000		15	No								Yes	Friends or family	1	1	1	0	No		Yes	Yes	Yes	Yes	Yes	Yes	Yes	Yes	Yes	Yes	Yes	Yes	Yes	Yes
58	Male	Married	0	1	0	0	Primary education /1-8/	Other Specify	0	1	0	0	0	0	0	0	1000		6	Yes	Others(specify)	0	0	0	0	0	1	Yes	Doctors(others health personal)	1	0	0	0	No		Yes	Yes	Yes	Yes	Yes	Yes	Yes	Yes	Yes	Yes	Yes	Yes	Yes	Yes
53	Female	Widowed	0	0	0	1	Primary education /1-8/	Other Specify	0	1	0	0	0	0	0	0	300		19	Yes	Others(specify)	0	0	0	0	0	1	Yes	Doctors(others health personal)	1	0	0	0	No		Yes	Yes	Yes	Yes	Yes	Yes	Yes	Yes	Yes	Yes	Yes	Yes	Yes	Yes
55	Female	Widowed	0	0	0	1	Not able to read and write	Other Specify	0	1	0	0	0	0	0	0	500		3	No	Others(specify)							No	Skip					No		No	No	Yes	Yes	Yes	Yes	Yes	Yes	Yes	Yes	Yes	Yes	Yes	Yes
80	Male	Married	0	1	0	0	Primary education /1-8/	Employed	1	0	0	0	0	0	0	0	3000		15	Yes	Others(specify)	0	0	0	0	0	1	Yes	Doctors(others health personal)	1	0	0	0	Yes		Yes	Yes	Yes	Yes	Yes	Yes	Yes	Yes	Yes	Yes	Yes	Yes	Yes	Yes
45	Female	Married	0	1	0	0	Able to read and write only	Employed	0	1	0	0	0	0	0	0	200		8	Yes	Others(specify)	0	0	0	0	0	1	Yes	Doctors(others health personal)	1	0	0	0	No		Yes	Yes	Yes	Yes	Yes	Yes	Yes	Yes	Yes	Yes	Yes	Yes	Yes	Yes
70	Male	Divorced	0	0	1	0	Primary education /1-8/	Employed	1	0	0	0	0	0	0	0	4000		10	Yes	Diabetic retinopathy	0	0	1	0	0	1	No	Skip					No		Yes	Yes	Yes	No	No	Yes	Yes	Yes	Yes	Yes	Yes	Yes	Yes	Yes
18	Male	Single	1	0	0	0	Primary education /1-8/	Employed	0	1	0	0	0	0	0	0	3000		10	No								Yes	Doctors(others health personal)	1	0	0	0	No		Yes	Yes	No	No	Yes	Yes	Yes	Yes	Yes	Yes	Yes	Yes	No	Yes
90	Male	Married	0	1	0	0	Secondary education /9-12/	Employed	1	0	0	0	0	0	0	0	2517		8	Yes	Others(specify)	0	0	0	0	0	1	Yes	Doctors(others health personal)	1	0	0	0	No		Yes	Yes	Yes	Yes	Yes	Yes	Yes	Yes	Yes	Yes	No	Yes	No	Yes
60	Female	Married	0	1	0	0	Not able to read and write	Unemployed	0	0	0	1	0	0	0	0	500		10	Yes	Diabetic nephropathy	1	0	0	0	0	0	No	Skip					No		Yes	Yes	Yes	Yes	Yes	Yes	Yes	Yes	Yes	Yes	Yes	Yes	Yes	Yes
37	Female	Married	0	1	0	0	Not able to read and write	Unemployed	0	0	0	1	0	0	0	0	500		15	No								Yes	Doctors(others health personal)	1	1	0	0	No		Yes	Yes	Yes	Yes	Yes	Yes	Yes	Yes	Yes	Yes	Yes	Yes	Yes	Yes
67	Male	Married	0	1	0	0	Primary education /1-8/	Other Specify	0	0	0	0	1	0	0	0	5000		7	No								Yes	Doctors(others health personal)	1	0	0	0	No		Yes	Yes	Yes	Yes	Yes	Yes	Yes	Yes	Yes	Yes	Yes	No	No	Yes
65	Male	Married	0	1	0	0	Not able to read and write	Other Specify	0	0	0	0	1	0	0	0	500		1	No								Yes	Doctors(others health personal)	1	0	0	0	No		Yes	Yes	Yes	Yes	Yes	Yes	Yes	Yes	Yes	Yes	Yes	Yes	Yes	Yes
71	Male	Married	0	1	0	0	Above grade 12	Employed	1	0	0	0	0	0	0	0	5000		10	No								Yes	Doctors(others health personal)	1	0	0	0	No		Yes	Yes	Yes	Yes	Yes	Yes	Yes	Yes	Yes	Yes	Yes	Yes	Yes	Yes
62	Female	Widowed	0	0	0	1	Above grade 12	Unemployed	0	0	0	1	0	0	0	0	1000		6	Yes	Diabetic-related heart disease	0	0	0	0	1	1	Yes	Doctors(others health personal)	1	0	0	0	Yes		Yes	Yes	Yes	Yes	Yes	Yes	Yes	Yes	Yes	Yes	Yes	Yes	Yes	Yes
52	Male	Married	0	1	0	0	Secondary education /9-12/	Employed	0	1	0	0	0	0	0	0	8000		5	No								Yes	Mass media	1	1	1	0	No		Yes	Yes	Yes	Yes	Yes	Yes	Yes	Yes	Yes	Yes	Yes	Yes	Yes	Yes
74	Female	Widowed	0	0	0	1	Able to read and write only	Other Specify	0	0	0	0	0	0	0	1	4200		18	No								Yes	Friends or family	1	1	0	0	No		No	Yes	No	Yes	Yes	Yes	Yes	No	Yes	Yes	Yes	Yes	No	Yes
82	Male	Married	0	1	0	0	Able to read and write only	Other Specify	0	0	0	0	0	0	0	1	3100		13	No								No	Skip					No		Yes	Yes	Yes	No	No	No	Yes	No	No	Yes	No	No	No	No
78	Male	Widowed	0	0	0	1	Not able to read and write	Other Specify	0	0	0	0	0	0	0	1	2500		23	No								No	Skip					No		Yes	Yes	Yes	No	No	Yes	No	No	No	No	No	Yes	No	No
36	Male	Single	1	0	0	0	Above grade 12	Employed	1	0	0	0	0	0	0	0	4700		3	No								No	Skip					No		Yes	Yes	Yes	Yes	Yes	Yes	Yes	Yes	Yes	Yes	Yes	Yes	Yes	Yes
60	Female	Widowed	0	0	0	1	Able to read and write only	Unemployed	0	0	0	1	0	0	0	0	3000		5	No								No	Skip					No		No	Yes	Yes	Yes	Yes	Yes	Yes	Yes	Yes	Yes	Yes	Yes	No	No
38	Male	Single	1	0	0	0	Above grade 12	Employed	1	0	0	0	0	0	0	0	5000		2	No								Yes	Mass media	1	1	0	0	No		Yes	Yes	Yes	Yes	No	Yes	No	Yes	No	Yes	Yes	No	Yes	Yes
45	Female	Single	1	0	0	0	Secondary education /9-12/	Other Specify	0	0	1	0	0	0	0	0	6000		1	No								Yes	Doctors(others health personal)	1	0	0	0	No		Yes	Yes	Yes	Yes	Yes	Yes	Yes	Yes	Yes	Yes	Yes	Yes	Yes	Yes
68	Male	Married	0	1	0	0	Able to read and write only	Other Specify	0	0	0	0	0	0	0	1	3000		12	No								No	Skip					No		Yes	Yes	Yes	Yes	Yes	Yes	Yes	No	Yes	No	No	No	No	Yes
80	Male	Married	0	1	0	0	Able to read and write only	Unemployed	0	0	0	0	1	0	0	0	12000		10	Yes	Others(specify)	0	0	0	0	0	1	Yes	Doctors(others health personal)	1	0	0	0	No		Yes	Yes	Yes	Yes	Yes	Yes	Yes	Yes	Yes	Yes	No	Yes	No	Yes
60	Male	Married	0	1	0	0	Primary education /1-8/	Employed	1	0	0	0	0	0	0	0	10000		7	Yes	Others(specify)	0	0	0	0	0	1	Yes	Doctors(others health personal)	1	0	0	0	No		Yes	Yes	Yes	Yes	Yes	Yes	Yes	Yes	Yes	Yes	Yes	Yes	No	Yes
45	Female	Married	0	1	0	0	Primary education /1-8/	Unemployed	0	0	0	1	0	0	0	0	9000		6	Yes	Others(specify)	0	0	0	0	0	1	Yes	Doctors(others health personal)	1	0	0	0	No		Yes	Yes	Yes	Yes	Yes	Yes	Yes	Yes	Yes	Yes	No	Yes	Yes	Yes
77	Male	Married	0	1	0	0	Able to read and write only	Other Specify	0	0	0	0	1	0	0	0	15000		10	Yes	Others(specify)	0	0	0	0	0	1	Yes	Doctors(others health personal)	1	0	0	0	No		Yes	Yes	Yes	Yes	Yes	Yes	Yes	Yes	Yes	Yes	No	Yes	No	Yes
50	Female	Married	0	1	0	0	Above grade 12	Employed	1	0	0	0	0	0	0	0	16000		8	Yes	Others(specify)	0	0	0	0	0	1	Yes	Doctors(others health personal)	1	0	0	0	No		No	Yes	Yes	Yes	Yes	Yes	Yes	Yes	Yes	Yes	No	Yes	Yes	Yes
60	Male	Married	0	1	0	0	Able to read and write only	Unemployed	0	0	0	0	1	0	0	0	10000		8	Yes	Others(specify)	0	0	0	0	0	1	Yes	Doctors(others health personal)	1	0	0	0	No		Yes	Yes	Yes	Yes	Yes	Yes	Yes	Yes	Yes	Yes	No	Yes	No	Yes
45	Female	Married	0	1	0	0	Able to read and write only	Unemployed	0	0	0	1	0	0	0	0	8000		5	Yes	Others(specify)	0	0	0	0	0	1	Yes	Doctors(others health personal)	1	0	0	0	No		Yes	Yes	Yes	Yes	Yes	Yes	Yes	Yes	Yes	Yes	No	Yes	Yes	Yes
65	Male	Married	0	1	0	0	Able to read and write only	Unemployed	0	0	0	0	1	0	0	0	9000		6	Yes	Diabetic-related heart disease	0	0	0	0	1	0	Yes	Doctors(others health personal)	1	0	0	0	No		Yes	Yes	Yes	Yes	Yes	Yes	Yes	Yes	Yes	Yes	No	Yes	No	Yes
56	Male	Married	0	1	0	0	Above grade 12	Employed	1	0	0	0	0	0	0	0	4500		4	Yes	Others(specify)	0	0	0	0	0	1	Yes	Doctors(others health personal)	1	0	0	0	No		Yes	Yes	Yes	Yes	Yes	Yes	Yes	Yes	Yes	Yes	Yes	Yes	Yes	Yes
70	Male	Married	0	1	0	0	Secondary education /9-12/	Employed	1	0	0	0	0	0	0	0	4500		12	Yes	Others(specify)	0	0	0	0	1	1	Yes	Doctors(others health personal)	1	0	0	0	Yes		Yes	Yes	Yes	Yes	Yes	Yes	Yes	Yes	Yes	Yes	Yes	Yes	Yes	Yes
46	Female	Married	0	1	0	0	Able to read and write only	Employed	0	1	0	0	0	0	0	0	2000		5	Yes	Others(specify)	0	0	0	0	0	1	Yes	Doctors(others health personal)	1	0	0	0	No		Yes	Yes	Yes	Yes	Yes	Yes	Yes	Yes	Yes	Yes	Yes	Yes	No	Yes
60	Male	Married	0	1	0	0	Above grade 12	Employed	1	0	0	0	0	0	0	0	5000		8	Yes	Diabetic nephropathy	1	0	0	0	0	1	Yes	Doctors(others health personal)	1	0	0	0	Yes		Yes	Yes	Yes	Yes	Yes	Yes	Yes	Yes	Yes	Yes	Yes	Yes	Yes	Yes
50	Male	Married	0	1	0	0	Primary education /1-8/	Unemployed	0	0	0	0	1	0	0	0	2000		1	No								Yes	Doctors(others health personal)	1	0	0	0	No		Yes	No	Yes	Yes	Yes	Yes	Yes	Yes	Yes	Yes	Yes	Yes	Yes	Yes
69	Male	Married	0	1	0	0	Above grade 12	Employed	1	0	0	0	0	0	0	0	4760		5	Yes	Others(specify)	0	0	1	0	0	1	Yes	Doctors(others health personal)	1	0	0	0	No		Yes	Yes	Yes	Yes	Yes	Yes	Yes	Yes	Yes	Yes	Yes	Yes	Yes	Yes
52	Male	Married	0	1	0	0	Secondary education /9-12/	Unemployed	0	0	0	0	1	0	0	0	1000		1	No								Yes	Doctors(others health personal)	1	0	0	0	No		Yes	Yes	Yes	Yes	Yes	Yes	Yes	Yes	Yes	Yes	Yes	Yes	Yes	Yes
60	Female	Married	0	1	0	0	Not able to read and write	Unemployed	0	0	0	1	0	0	0	0	500		12	Yes	Diabetic nephropathy	1	1	0	0	0	0	No	Skip					No		Yes	No	Yes	Yes	Yes	Yes	No	Yes	Yes	Yes	Yes	Yes	No	No
70	Female	Widowed	0	0	0	1	Not able to read and write	Employed	0	1	0	0	0	0	0	0	2000		7	Yes	Others(specify)	0	0	0	0	0	1	Yes	Doctors(others health personal)	1	0	0	0	No		Yes	Yes	Yes	Yes	Yes	Yes	Yes	Yes	Yes	Yes	Yes	Yes	Yes	Yes
[truncated: 109 more columns]
